# 1 IDENTIFYING PLANT GENES SHAPING MICROBIOTA 2 COMPOSITION IN THE BARLEY RHIZOSPHERE

3 Carmen Escudero-Martinez<sup>1,11</sup>, Max Coulter<sup>1,2,11</sup>, Rodrigo Alegria Terrazas<sup>1,3</sup>,  
4 Alexandre Foito<sup>4</sup>, Rumana Kapadia<sup>1</sup>, Laura Pietrangelo<sup>1,5</sup>, Mauro Maver<sup>1,6,7</sup>, Rajiv  
5 Sharma<sup>8</sup>, Alessio Aprile<sup>1,9</sup>, Jenny Morris<sup>4</sup>, Pete E. Hedley<sup>4</sup>, Andreas Maurer<sup>10</sup>, Klaus  
6 Pillen<sup>10</sup>, Gino Naclerio<sup>5</sup>, Tanja Mimmo<sup>6,7</sup>, Geoffrey J. Barton<sup>2</sup>, Robbie Waugh<sup>1,4</sup>,  
7 James Abbott<sup>2</sup> and Davide Bulgarelli<sup>1\*</sup>

8 <sup>1</sup>University of Dundee, Plant Sciences, School of Life Sciences, Dundee, UK; <sup>2</sup>University of Dundee,  
9 Computational Biology, School of Life Sciences, Dundee, UK; <sup>3</sup>Mohammed VI Polytechnic University,  
10 Agrobiosciences Program, Plant & Soil Microbiome Subprogram, Bengurir, Morocco; <sup>4</sup>The James  
11 Hutton Institute, Invergowrie, UK; <sup>5</sup>Department of Biosciences and Territory, University of Molise,  
12 Campobasso, Italy; <sup>6</sup>Faculty of Science and Technology, Free University of Bozen-Bolzano, Bolzano,  
13 Italy; <sup>7</sup>Competence Centre for Plant Health, Free University of Bozen-Bolzano, Bolzano, Italy;  
14 <sup>8</sup>Scotland's Rural College, Edinburgh, UK; <sup>9</sup>Department of biological and environmental sciences and  
15 technologies, University of Salento, Lecce, Italy; <sup>10</sup>Institute of Agricultural and Food Science and Plant  
16 Breeding, Martin Luther University, Halle-Wittenberg, Germany; <sup>11</sup>These authors contributed equally:  
17 Carmen Escudero-Martinez and Max Coulter.

18 \*Correspondence: [d.bulgarelli@dundee.ac.uk](mailto:d.bulgarelli@dundee.ac.uk)

19

## 20 Abstract

21

22 A prerequisite to exploiting soil microbes for sustainable crop production is the  
23 identification of the plant genes shaping microbiota composition in the rhizosphere,  
24 the interface between roots and soil. Here we use metagenomics information as an  
25 external quantitative phenotype to map the host genetic determinants of the  
26 rhizosphere microbiota in wild and domesticated genotypes of barley, the fourth most  
27 cultivated cereal globally. We identify a small number of loci with a major effect on  
28 the composition of rhizosphere communities. One of those, designated the *QRMC-*  
29 *3HS*, emerges as a major determinant of microbiota composition. We subject soil-  
30 grown sibling lines harbouring contrasting alleles at *QRMC-3HS* and hosting  
31 contrasting microbiotas to comparative root RNA-seq profiling. This allows us to  
32 identify three primary candidate genes, including a Nucleotide-Binding-Leucine-Rich-  
33 Repeat (*NLR*) gene in a region of structural variation of the barley genome. Our  
34 results provide insights into the footprint of crop improvement on the plant's capacity  
35 of shaping rhizosphere microbes.

## 36 Introduction

37

38 Plants thrive in association with diverse microbial communities, collectively referred  
39 to as the plant microbiota. This is capable of impacting the growth, development and  
40 health of their hosts<sup>1-4</sup>. The rhizosphere, the interface between the roots and soil<sup>5</sup>, is  
41 a key microhabitat for the plant microbiota. For instance, similar to probiotics of the  
42 microbiota populating the digestive tract of vertebrates<sup>6</sup>, microbes inhabiting the  
43 rhizosphere can promote plant growth by facilitating mineral nutrient uptake and  
44 pathogen protection<sup>1,7-10</sup>.

45 These interactions do not represent stochastic events but are controlled, at least in  
46 part, by the plant genome<sup>11,12</sup>. Resolving the host genetic control of the microbes  
47 thriving at the root-soil interface therefore represents one of the prerequisites for the  
48 rational manipulation of the plant microbiota for agriculture<sup>13</sup>. This is particularly  
49 relevant for the microbiota associated with crop wild relatives, which, having evolved  
50 under marginal soil conditions, may represent an untapped resource for low-input  
51 agriculture<sup>14,15</sup>. However, despite a footprint of domestication and crop selection  
52 having been identified in the taxonomic composition of the rhizosphere microbiota in  
53 multiple plant species<sup>16-23</sup>, host genes underpinning this diversification remain poorly  
54 understood.

55 Barley is the fourth-most cultivated cereal globally<sup>24</sup> and an attractive experimental  
56 model to study plant-microbe interactions in the light of domestication and crop  
57 selection. We previously demonstrated that wild genotypes and 'elite' cultivated  
58 varieties host contrasting rhizosphere microbiotas<sup>25,26</sup>. In this work, capitalising on an  
59 experimental population between barley genotypes at opposing ends of the  
60 domestication framework<sup>27</sup> and utilising state-of-the-art genomic<sup>28</sup> and  
61 transcriptomic<sup>29</sup> resources, we map host genetic determinants of microbiota  
62 composition in the rhizosphere, we identify candidate genes putatively underpinning  
63 this trait and define genetic variation occurring at those genes.

## 64 Results

65 The composition of the bacterial microbiota displays quantitative variation in the  
66 barley rhizosphere that appears to be controlled by a limited number of loci

67 We grew 52 genotypes of the progeny of a segregating population between the elite  
68 cultivar (*Hordeum vulgare* ssp. *vulgare*) 'Barke' and the wild ancestor accession  
69 (*Hordeum vulgare* ssp. *spontaneum*) called HID-144 (see Methods), hereafter  
70 designated 'elite' and 'wild' respectively, in a soil previously used for investigating the  
71 barley rhizosphere microbiota<sup>26,30,31</sup> under controlled environmental conditions (see  
72 Methods). At early stem elongation (Supplementary Fig. 1), plants were removed  
73 from their substrates, and the rhizosphere fractions alongside bulk soil controls were  
74 subjected to an amplicon sequencing survey of the 16S rRNA gene.

75 Having defined a threshold for PCR reproducibility of individual amplicon sequencing  
76 variants (ASVs) (Supplementary Fig. 2), representing the terminal taxonomic nodes  
77 in our sequencing profiling, we inspected the impact of the parental lines on the  
78 composition of the bacterial microbiota. This allowed us to identify 36 ASVs  
79 discriminating between the parental lines (Wald test, individual  $P$ -value  $< 0.05$ , FDR  
80 corrected, Fig. 1 a). Of these taxa, 27 ASVs, representing 5.39 % of the reads, were  
81 enriched in and discriminated between the wild genotype and the elite variety (Wald  
82 test, individual  $P$ -value  $< 0.05$ , FDR corrected, Fig. 1 a). Conversely, 9 ASVs  
83 representing 2.74 % of the reads were enriched in and discriminated between the  
84 elite variety and the wild genotype (Wald test, individual  $P$ -value  $< 0.05$ , FDR  
85 corrected, Fig. 1 a). This differential microbial enrichment between the parental lines  
86 was associated with a taxonomic diversification at phylum level: while the wild-  
87 enriched profiles encompassed several ASVs classified as Bacteroidota (33.9 % of  
88 the enriched reads), Firmicutes (32.8 %), Proteobacteria (27.9 %) Acidobacteria (3.7  
89 %) and Myxococcota (1.3 %); the elite parent enriched predominantly for members of  
90 the phylum Actinobacteria (55.8 %), followed by members of Firmicutes (17.8 %),  
91 Proteobacteria (15.3 %), Bacteroidota (10.8 %) and Acidobacteria (0.3 %)  
92 (Supplementary Fig. 3). Next, we extended our survey to the entire segregating  
93 population. We made two observations. First, and consistent with previous  
94 investigations in the same reference soil<sup>26,30,31</sup>, rhizosphere communities were  
95 significantly different from unplanted soil controls as illustrated by sample separation  
96 along the x-axis of the Canonical analysis of Principal coordinates (CAP) (Adonis

97 test between bulk soil and rhizosphere samples,  $F = 7.49$ ,  $P$ -value = 0.001, 5,000  
98 permutations, [Fig. 1 b](#)). Despite identifying a significant impact of genotype on the  
99 composition of the rhizosphere samples, we failed to partition this variation into  
100 discrete classes (Adonis test,  $R^2$  genotype among rhizosphere samples = 0.0403,  $F$   
101 = 2.23,  $P$ -value < 0.001, 5,000 permutations, [Fig. 1 b](#)). Thus, while samples  
102 corresponding to the elite genotype segregated from the wild genotype along the y-  
103 axis accounting for the second source of variation in a constrained ordination,  
104 individual segregants were distributed between the parental lines. This distribution  
105 mirrored the increased proportion of elite genome expected in the original back-  
106 crossed  $BC_1S_3$  population, with the majority of microbiota profiles of segregating  
107 individuals located spatially closer to the elite genotype ([Fig. 1 b](#)). These  
108 observations suggest that microbiota variation in the barley rhizosphere can be used  
109 as a trait in quantitative genetic studies.

110 To gain insights into the host genetic control of the rhizosphere microbiota, we  
111 developed a reductionistic approach whereby we used taxa that were differentially  
112 recruited between the parental lines and their abundances in the segregating  
113 population as “quantitative phenotypes” to search for significant associations with  
114 genetic markers located throughout the barley genome. To ascertain the  
115 phylogenetic congruence of the observed microbial trait we repeated this analysis at  
116 different taxonomic levels with sequencing reads agglomerated at genus and family  
117 level, respectively. For several bacteria we had previously characterised as being  
118 differentially abundant between the parental lines, we identified significant  
119 associations with individual homozygous or heterozygous alleles at multiple loci  
120 across the barley genome. These associations are supported either by marker  
121 regression or by a minimum LOD score of 3.43 at ASV, 3.56 at genus and 3.65 at  
122 family levels based on a LOD genome-wide significance threshold (alpha level = 0.2;  
123 1,000 permutations) ([Fig. 2](#), [Supplementary Fig. 4-6](#), [Supplementary Table 1 and 2](#),  
124 [Supplementary Data 1](#)). However, one locus that mapped between 38.7 and 40.6  
125 centimorgans (cM) on chromosome 3H was associated with the recruitment of  
126 phylogenetically unrelated bacteria at multiple taxonomic levels. The locus was  
127 identified as *QRMC.BaH144-3HS* where *QRMC* stands for QTL–Rhizosphere  
128 Microbiota Composition, *BaH144* corresponds to the cross Barke x HID-144 and  
129 *3HS* the short arm of chromosome 3H, hereafter referred to as *QRMC-3HS*. All the

130 bacteria recruited at *QRMC-3HS* were significantly enriched in the wild parent. We  
131 observed up to four unrelated ASVs representing 5.68 % of the enriched bacterial  
132 reads in the parental lines were linked to the *QRMC-3HS* classified as *Variovorax*  
133 *sp.*, *Holophaga sp.*, *Sorangium sp.* and *Tahibacter sp.* When taxa were  
134 agglomerated at the genus level, the number of significant associations increased to  
135 five, including the genus *Rhodanobacter*. The same analysis computed at family  
136 level revealed a congruent phylogenetic pattern associated with this locus  
137 represented by Comamonadaceae (the family of the genus *Variovorax*),  
138 Holophagaceae (*Holophaga*), Polyangiaceae (*Sorangium*) and Rhodanobacteraceae  
139 (*Rhodanobacter* and *Tahibacter*) ([Supplementary Tables 1-5](#)). *QRMC-3HS* was the  
140 only QTL recurrently found at different taxonomic levels presenting associations with  
141 up to five taxa across analyses with a LOD threshold established with more stringent  
142 criteria (alpha level = 0.05; 1,000 permutations) ([Supplementary Table 2](#)), and  
143 explaining at least ~20 % of the phenotypic variance (*i.e.*, sequencing reads) for the  
144 individual taxa significantly associated to it ([Supplementary Tables 3-5](#)). These  
145 results indicate that *QRMC-3HS* represents a major plant genetic determinant of  
146 microbiota recruitment in the barley rhizosphere.

#### 147 [Wild introgressions at \*QRMC-3HS\* are associated with compositional changes in](#) 148 [rhizosphere bacterial microbiota](#)

149 To validate the results of the mapping exercise, we tested whether barley lines  
150 harbouring contrasting alleles, *i.e.*, either 'elite' or 'wild', at *QRMC-3HS* would be  
151 associated with distinct microbial phenotypes. We generated two sibling lines  
152 designated 124\_17, carrying 'elite' alleles at *QRMC-3HS*, and 124\_52, harbouring  
153 'wild' alleles at *QRMC-3HS* ([Supplementary Fig. 1](#)) by selfing the progeny of line  
154 HEB\_15\_124 which we identified as being heterozygous at the locus of interest (see  
155 Methods). Besides the genetic differences at *QRMC-3HS*, the derived lines share  
156 95.5 % and 93.3 % of their genomes, respectively, with the elite parent based on  
157 molecular marker profiling using the barley 50k iSelect SNP Array<sup>32</sup> ([Supplementary](#)  
158 [Table 6, Supplementary Data 3](#)). They also represent *bona fide* progenies of the  
159 population investigated in this study ([Supplementary Table 6](#)).

160 We grew these sibling lines, along with the elite genotype and bulk soil controls, in  
161 the same experimental set-up described for the mapping experiment. We quantified

162 16S rRNA gene total abundance for these rhizosphere and bulk soil samples as a  
163 first step towards a comparative microbiota profiling of the new material. This  
164 quantification showed no statistical differences of 16S RNA gene total abundance  
165 among the tested genotypes (Kruskal-Wallis test,  $\chi^2 = 12.47$ , and Dunn post-hoc  
166 test,  $P$ -value  $< 0.05$ , [Supplementary Fig. 7 a](#)). We next inspected three ecological  
167 indices of alpha diversity, *i.e.*, within sample microbial diversity, namely ‘observed  
168 ASVs’, ‘Chao1’ and ‘Shannon’ indices, proxies for microbiota richness and  
169 evenness. This analysis did not reveal significant differences between the  
170 communities inhabiting the rhizosphere of the sibling lines and those of the elite  
171 Barke at the threshold we imposed (ANOVA and Tukey post-hoc test,  $P$ -value  $<$   
172  $0.05$ , [Supplementary Fig. 8](#)). Conversely, we did identify a significant host-genotype  
173 component when we inspected beta-diversity, which is the between sample microbial  
174 diversity, a proxy for microbiota composition (Adonis test,  $R^2$  genotype = 0.119,  $F =$   
175 1.84,  $P$ -value = 0.005, 5,000 permutations). This was manifested by the separation  
176 of the communities associated with the tested genotypes, in particular those of line  
177 124\_52 (wild-like) from those of the parental line Barke along the axis accounting for  
178 the major variation in a CAP ([Fig. 3 a](#)). We were, however, unable to determine  
179 which individual ASVs were responsible for the observed differentiation at the  
180 threshold imposed in the mapping experiment (Wald test, individual  $P$ -value  $< 0.05$ ,  
181 FDR corrected).

182 These results nevertheless indicate that genetic variation at *QRMC-3HS* is  
183 associated with a significant shift in community composition in the rhizosphere. This  
184 trait is not driven by 16S rRNA gene total abundance nor by differences in  
185 community richness and evenness. Despite a significant change in community  
186 composition, a wild introgression at *QRMC-3HS* is not however sufficient to trigger  
187 differential enrichments of individual bacteria.

### 188 [Genetic variation at \*QRMC-3HS\* does not perturb the composition of the barley](#) 189 [fungal microbiota](#)

190 To investigate whether *QRMC-3HS* could shape the fungal communities inhabiting  
191 the rhizosphere, we carried out a similar sequencing survey using the rRNA ITS  
192 region. In common with the observed results for the bacterial counterpart, the  
193 evaluation of the ITS region total abundance did not reveal significant differences

194 between the sibling lines and the elite parental line Barke (Kruskal-Wallis  $\chi^2 =$   
195 25.986, and Dunn post-hoc test, individual  $P$ -value  $< 0.05$ , [Supplementary Fig. 7 b](#)).

196 Next, we generated an amplicon sequencing library using primers targeting the rRNA  
197 ITS region and identified a total of 216 fungal ASVs after applying filtering criteria  
198 (see Methods). When we implemented a beta-diversity analysis of the ITS library, we  
199 failed to identify a significant effect of the host genotype on these communities  
200 (Adonis test,  $F = 0.26$ ,  $P$ -value = 0.963, 5,000 permutations). This was further  
201 manifested by the lack of spatial separation among microbiota samples of different  
202 genotypes in a CAP ([Fig. 3 b](#)) Likewise, no differentially recruited ASVs were  
203 identified in pair-wise comparisons using DESeq2 (Wald test, individual  $P$ -values  $<$   
204 0.05, FDR corrected).

205 These observations suggest that the selection pressure exerted by *QRMC-3HS* on  
206 the barley microbiota is predominantly confined to its bacterial members.

#### 207 [QRMC-3HS does not impact other root and yield traits](#)

208 To gain mechanistic insights into the plant traits associated with microbiota  
209 diversification, we examined the root macro architecture, as morphological  
210 differences in barley roots can alter microbial composition in the rhizosphere<sup>18,30</sup>.  
211 When we measured root weight and nine different root morphology parameters of  
212 plants grown in the same soil used for microbiota characterisation, no significant  
213 differences were found between the sibling lines and the elite genotype at the  
214 imposed threshold (*i.e.*, Kruskal–Wallis and post-hoc Dunn’s test,  $P$ -values  $< 0.05$ ,  
215 [Supplementary Table 7](#)).

216 Next, we grew the sibling lines and the elite genotype in sterile sand and determined  
217 the elemental composition of carbon and nitrogen in their exudates, as both of these  
218 elements represent another possible driver of microbial recruitment in the  
219 rhizosphere<sup>33–35</sup>. We selected two different timepoints: 2- and 3-weeks post-  
220 transplantation, to study the patterns of exudation. The former timepoint is critical for  
221 the establishment of the bacterial community in cereals<sup>36</sup>, while the latter  
222 corresponds to the onset of stem elongation when the rhizosphere is harvested for  
223 microbial profiling<sup>26,30,31</sup>. As plants were supplemented with a nutrient solution (see  
224 Methods), we used wash-through from unplanted pots as controls. The carbon  
225 content was significantly higher in the planted samples compared with the unplanted

226 ones regardless of the timepoint. For instance, unplanted samples wash-through  
227 contained just 1.5-3.6 % in carbon content weight (w/w), while that of plant exudates  
228 was 23-31 % in weight, although no significant differences among genotypes were  
229 identified at the imposed threshold (*i.e.*, Kruskal–Wallis test 2 weeks,  $\chi^2 = 12.473$ ;  
230 Kruskal–Wallis test 3 weeks,  $\chi^2 = 8.890$  and post-hoc Dunn's test,  $P$ -values < 0.05)  
231 ([Supplementary Fig. 9 a](#)). No significant effect was identified among time-points,  
232 regardless of the type of specimen investigated, *i.e.*, unplanted wash-through or  
233 planted exudates (Kruskal–Wallis test,  $\chi^2 = 17.761$ ,  $P$ -value < 0.05) ([Supplementary](#)  
234 [Fig. 9 b](#)). Likewise, nitrogen content at the earliest timepoint (2 weeks) ranged from  
235 2.8 to 6.0 % (w/w) and was not statistically different between unplanted wash-  
236 through or planted samples (ANOVA,  $F = 1.035$ ,  $P$ -value > 0.05) ([Supplementary](#)  
237 [Fig. 9 c](#)). We could, however, differentiate among samples at the later timepoint (3  
238 weeks), with a higher nitrogen content of 10-18 % (w/w) in the unplanted wash-  
239 through, compared to the exudates of planted samples ranging from 4-6 % (w/w)  
240 compatible with the plant's uptake of this mineral from the nutrient solution. Within  
241 these latter specimens, no significant differences among the tested genotypes were  
242 identified (Kruskal–Wallis,  $\chi^2 = 8.567$ , and post-hoc Dunn's test,  $P$ -value < 0.05)  
243 ([Supplementary Fig. 9 d](#)).

244 We next explored the primary metabolism of the sibling lines and the elite genotype  
245 exudates at the onset of stem elongation stage (3 weeks) using gas  
246 chromatography–mass spectrometry (GC/MS). The metabolites recovered belong to  
247 categories such as amino acids, organic acids, carbohydrates, and other polar  
248 compounds ([Supplementary Fig. 10](#)). Amongst carbohydrates, fructose and glucose  
249 represented the largest fraction of the exudates ([Supplementary Fig. 10 a](#)). We  
250 found the majority of the compounds were classified as amino acids, with L-valine, L-  
251 leucine, L-proline, L-isoleucine, L-glutamic and L-aspartic acid as the more abundant  
252 ([Supplementary Fig. 10 b](#)). The main organic acid retrieved was succinic acid  
253 ([Supplementary Fig. 10 c](#)), while gamma-aminobutyric acid (GABA) was the most  
254 abundant in the 'other polar compounds' category ([Supplementary Fig. 10 d](#)). These  
255 compounds were present in comparable relative amounts regardless of the  
256 genotype, and the genotype effect on the metabolic composition of the exudates was  
257 not statistically significant (ANOVA and post-hoc Tukey or Kruskal–Wallis and post-  
258 hoc Dunn's test,  $P$ -values > 0.05, [Supplementary Data 2](#)).



259 To investigate any potential effect of *QRMC-3HS* on yield, we grew the sibling lines  
260 along with the elite cultivar Barke under the same conditions as the microbiota  
261 profiling to measure the thousand grain weight (TGW) and main tiller grain weight in  
262 four independent experiments ([Supplementary Fig. 11](#)). Despite a batch effect  
263 identified for one of the replicated experiments, we observed a congruent trend  
264 where the elite material had higher yield than the sibling lines, regardless of their  
265 allelic composition at *QRMC-3HS* (ANOVA TGW,  $F = 16.642$ ; ANOVA main tiller  
266 grain weight,  $F = 20.098$ ; post-hoc Tukey,  $P$ -values  $<0.05$ ) ([Supplementary Fig. 11](#)).  
267 We interpret this as an indication that the *QRMC-3HS* alone may not be linked to the  
268 yield traits measured. As the sibling lines share a minor proportion (~5 %) of wild  
269 alleles at other loci, we cannot exclude a contribution of these to the yield phenotype.  
270 For instance, we identified an overlap between a yield QTL detected in the same  
271 experimental population in the pericentromeric region of chromosome 6H (43.6-52.2  
272 cM)<sup>37</sup> and a region containing a wild introgression in both sibling lines  
273 ([Supplementary Data 3](#)). Likewise, genes responsible for the seed dispersal attribute  
274 of wild barley spikes, designated brittle rachis<sup>37</sup> (HvBtr1–HvBtr2 locus at 40,451,507  
275 – 40,710,518 bp on chromosome 3H) map physically near to *QRMC-3HS*  
276 (33,181,340 – 36,970,860 bp on cultivar Barke) and may be implicated in the  
277 reduced yield observed in the sibling lines. We therefore used molecular markers  
278 (see Methods) to ascertain haplotype composition for these two genes. This  
279 revealed that both sibling lines and the wild parental line carry the wild alleles as they  
280 do not show mutations in *Btr1* or *Btr2* ([Supplementary Fig. 12](#)). Conversely, our elite  
281 parent Barke and four other elite lines used as controls, displayed a mutation in  
282 either of these genes, consistent with previous observations ([Supplementary Fig.](#)  
283 [12](#)).

#### 284 The sibling lines at *QRMC-3HS* and the cultivar Barke display distinct root 285 transcriptional profiles

286 To further dissect the genetic mechanisms behind the differences in microbiota  
287 recruitment observed between the sibling lines 124\_17 (elite-like) and 124\_52 (wild-  
288 like), we conducted a comparative RNA-seq experiment using root tissue from the  
289 sibling lines and Barke. A total of 15 RNA-seq libraries were sequenced, with five  
290 biological replicates for each of the three genotypes ([Supplementary Table 8](#)). Three

291 comparisons were made: 124\_52 vs Barke, 124\_17 vs Barke and 124\_52 vs 124\_17  
292 using the BaRTv2<sup>29</sup> Barke transcriptome as a reference.

293 Consistent with the high genotypic similarity between the sibling lines and Barke,  
294 only 84 BaRTv2 genes were found to be differentially expressed (DE) in the 124\_52-  
295 Barke comparison, whilst 37 DE genes were identified in the 124\_52-124\_17  
296 comparison. Interestingly, no DE genes were identified in the 124\_17-Barke  
297 comparison, and all but three of the DE genes identified in the 124\_52-124\_17  
298 comparison were also found in the 124\_52-Barke comparison (EdgeR, Individual *P*-  
299 value < 0.01, FDR corrected, [Fig. 4](#)). These results agree with the expectation that  
300 lines with the elite *QRMC-3HS* alleles (*i.e.*, the 124\_17 sibling line and Barke) have  
301 similar transcriptional profiles, with changes in transcription possibly reflecting  
302 changes in microbiota complement ([Fig. 3](#))

303 A contrasting microbial phenotype was observed between the sibling lines 124\_52  
304 and 124\_17, despite their similarity at the genetic level ([Fig. 3](#), [Supplementary Table](#)  
305 [6](#), [Supplementary Data 3](#)). Therefore, we decided to focus on the 34 DE genes  
306 shared between the 124\_52-124\_17 and 124\_52-Barke comparisons ([Fig. 4](#)), to  
307 identify gene products potentially shaping the bacterial microbiota. The full list of 34  
308 DE genes is found in [Supplementary Data 4](#). Of the 34 DE genes in the 124\_52-  
309 124\_17 comparison, only two mapped within the *QRMC-3HS*. The first of these  
310 genes is of unknown function, while the second is annotated as a nuclear binding  
311 leucine-rich-repeat like (*NLR*).

312 To understand how underlying genetic differences between 124\_52 and 124\_17  
313 related to gene expression changes, the allelic composition of these two lines were  
314 compared at chromosome 3H ([Fig. 5 b](#)), and on the other 6 barley chromosomes  
315 ([Supplementary Fig. 13-18](#)). We mined for regions of contrasting allelic composition  
316 in each of the seven chromosomes, and once identified, these were related back to  
317 the expression changes of genes expressed in the dataset ([Fig. 5](#), [Supplementary](#)  
318 [Fig.13-18](#)). We found that the majority (31 of the 34 DE genes) were found on  
319 chromosome 3H, and that 28 of these were present at regions of the chromosome  
320 with contrasting alleles between 124\_52 and 124\_17 ([Fig. 5](#)). The three DE genes  
321 identified on other chromosomes were all found in regions where alleles between  
322 124\_52 and 124\_17 do not differ. These results suggest that DE between 124\_52

323 and 124\_17 is predominantly due to cis-regulation or non-orthologous gene variation  
324 (presence/ absence variation), and that the number of trans-regulated genes is  
325 relatively small. A prediction of this observation is that differences in rhizosphere  
326 microbial phenotype between the two lines are not likely due to a large-scale  
327 reprogramming of the transcriptome. This is also reflected in the underrepresentation  
328 of differentially expressed transcription factors in the 34 124\_52-124\_17 DE genes  
329 ([Supplementary Data 4](#)).

### 330 [Identification and prioritisation of \*QRMC-3HS\* candidate genes](#)

331 A total of 59 genes were identified in the BaRTv2 gene/transcript<sup>29</sup> annotation within  
332 the bounds of the *QRMC-3HS* (identified as 33,181,340 – 36,970,860 bp on  
333 chromosome 3H in the cultivar Barke, [Supplementary Data 5](#)). Of these, 25 were  
334 found to be expressed in the RNA-seq dataset and were prioritised, as they are likely  
335 to be expressed in root tissue ([Supplementary Data 5](#)). As previously described, two  
336 out of these 25 genes were found to be DE in the 124\_52-124\_17 comparison  
337 subset of 34 genes ([Supplementary Data 4](#)).

338 To further prioritise candidate genes, variant calling was carried out to identify likely  
339 high impact and non-synonymous variants between lines 124\_52 (wild-like) and  
340 124\_17 (elite-like). The variants were annotated with the BaRTv2.18 annotation  
341 using SnpEff<sup>38</sup>. A detailed annotation of SNPs identified in each expressed gene is  
342 shown in [Supplementary Data 6](#). A total of 545 variants were identified across the 59  
343 BaRTv2 genes annotated within *QRMC-3HS*. However, many of these variants were  
344 found in genes not expressed in our RNA-seq data, or were annotated as having low  
345 impact, meaning they are either synonymous changes or located in non-coding (5'/3'  
346 UTR) regions of genes and were therefore not considered as priority candidates.  
347 Two genes carried high-impact variants. BaRT2v18chr3HG123110, of unknown  
348 function, has a frameshift variant and a missing stop codon.  
349 BaRT2v18chr3HG123140, annotated as a putative Xyloglucan  
350 endotransglucosylase/hydrolase enzyme (XTH) carries a frameshift variant close to  
351 the 5' end of the coding sequence (CDS) ([Supplementary Fig. 19](#)). Fourteen other  
352 genes had moderate impact variants, all of which have missense (non-synonymous)  
353 SNPs ([Supplementary Data 6](#)).

354 In summary, three genes in the *QRMC-3HS* were found to either be differentially  
355 expressed between two pair-wise comparisons, *i.e.*, 124\_52 vs. 124\_17, and 124\_52  
356 vs. Barke, or have high impact variants and are therefore considered as primary  
357 candidates for shaping the barley rhizosphere microbiota ([Supplementary Data 6](#)).

### 358 [Structural variation at \*QRMC-3HS\* in the barley pan-genome](#)

359 The recent publication of the barley pan-genome<sup>28</sup> enabled us to investigate  
360 potential structural variants at *QRMC-3HS*. These may affect gene presence or  
361 expression, and therefore may impact on candidate gene prioritisation. The genome  
362 sequence for Barke is represented in the pan-genome, although our wild parent is  
363 not. We initially compared the sequence across the *QRMC-3HS* in the cultivar Barke  
364 to the corresponding sequence in the cultivar Morex ([Fig. 6 a](#)). The alignment  
365 showed conserved synteny across the *QRMC-3HS* except close to the distal end,  
366 where a region of dissimilarity of approximately 480 kb (Barke 3H: 36,582,968 –  
367 37,063,927 bp) was identified ([Fig. 6 a](#)). To explore whether this was unique to the  
368 Barke-Morex comparison, we compared Barke to 14 other lines in the pan-genome  
369 ([Supplementary Fig. 20](#)). Comparisons of Barke with Golden Promise ([Fig. 6 b](#)),  
370 Hockett and HOR13942 ([Supplementary Fig. 20](#)) showed continuous synteny across  
371 *QRMC-3HS*, whilst the other 12 comparisons, including that with the only wild  
372 genotype in the pan-genome (B1K-04-12) showed a break in synteny similar to that  
373 observed in Morex ([Fig. 6 a](#), [Supplementary Fig. 20](#)).

374 The putative *NLR* gene, BaRT2v18chr3HG123500, which was DE between 124\_17  
375 (elite-like) and 124\_52 (wild-like) ([Fig. 5](#), [Supplementary Data 4](#)), has a physical  
376 position on chromosome 3H at 36,880,423 – 36,890,887 bp, within this region of  
377 dissimilarity ([Supplementary Data 4, 5](#), [Fig. 6 a](#)). According to the pan-genome  
378 annotation, an ortholog of this gene is not present in Morex, RGT Planet or B1K-04-  
379 12. A closer look at the counts per million of the candidate *NLR* revealed that this  
380 gene is expressed at low levels in 124\_52 ([Fig. 7 a](#)).

381 To determine whether this low expression is due to the absence of the gene, we  
382 designed a PCR marker specific to a region of the predicted gene  
383 BaRT2v18chr3HG123500 ([Fig. 7 b](#)). We further predicted, based on sequence  
384 comparisons ([Fig. 6](#), [Supplementary Fig. 20](#)), that the gene would be absent from  
385 Morex and RGT Planet, but present in genotypes carrying an elite *QRMC-3HS* (*i.e.*,

386 Barke, Hockett, Golden Promise and 124\_17) and so these were included as  
387 positive and negative controls, in addition to the wild parental line HID-144. PCR  
388 results showed that an amplicon derived from the putative *NLR* gene was not  
389 detectable in RGT Planet and Morex, as anticipated from sequence comparisons,  
390 while it was present in Barke, Hockett and Golden Promise (Fig. 7 c). The amplicon  
391 was found to be present in both 124\_52 (wild-like) and 124\_17 (elite-like) as well as  
392 HID-144, albeit with a different size product in HID-144 and 124\_52 (Supplementary  
393 Fig. 21). This suggests that the difference in *NLR* gene expression between 124\_52  
394 and 124\_17 may not be due to presence/absence but other polymorphisms in its  
395 genomic sequence (Supplementary Fig. 21). Regardless, pan-genome comparisons  
396 identify the region at the distal end of the *QRMC-3HS* around the putative *NLR* as a  
397 region of sequence divergence.

## 398 Discussion

399 In the present study, we combined microbiota abundance and quantitative genetics  
400 to identify regions of the barley genome responsible for rhizosphere microbiota  
401 recruitment. Our results demonstrate that the taxonomic composition of the  
402 rhizosphere microbiota can be treated as a quantitative trait whose genetic basis  
403 display structural variants in the barley genome.

404 Our genetic mapping experiment demonstrated that the heritable component of the  
405 barley microbiota in the rhizosphere is controlled by a relatively low number of loci.  
406 This is congruent with observations of the bacterial communities inhabiting the  
407 phyllosphere of the model plant *Arabidopsis*<sup>39</sup>, the staple crop maize<sup>40</sup> and the cereal  
408 sorghum<sup>41</sup>. One of the loci identified in our study, designated *QRMC-3HS*, displays  
409 an association with several phylogenetically unrelated bacteria, with the notable  
410 exception of members of Actinobacteria. While the latter are among the bacteria  
411 significantly enriched in the elite parent, as previously observed for barley plants  
412 grown in the same soil<sup>26</sup>, no members of this phylum map at *QRMC-3HS*. A  
413 prediction from this observation is that the capacity of soil bacteria to engage with  
414 the locus *QRMC-3HS* may be evolutionarily conserved across microbial lineages.  
415 This scenario would be congruent with comparative bacterial genomics data which  
416 indicates that taxonomically diverse bacteria can share the same adaptive  
417 mechanisms to the plant environment<sup>42,43</sup>. An alternative, and not mutually exclusive

418 scenario, is that *QRMC-3HS* mediates the recruitment of a so-called ‘microbiota  
419 hubs’, *i.e.*, individual microorganisms capable of regulating the proliferation of other  
420 members of the community, as observed in *Arabidopsis*<sup>44</sup> and maize<sup>45</sup>. Mining  
421 metagenome-assemblies that are significantly associated to plant loci (Oyserman *et*  
422 *al.*, accompanying manuscript) as well as tapping into recently developed synthetic  
423 communities of the barley microbiota<sup>46</sup> will enable these scenarios to be investigated  
424 experimentally.

425 The development of powerful genetic and genomic resources allowed us to  
426 characterise *QRMC-3HS* at an unprecedented level. We made three important  
427 observations. First, the sibling lines harbouring contrasting homozygous alleles at  
428 *QRMC-3HS* host contrasting bacterial microbiotas. Despite these lines not triggering  
429 the significant enrichment of individual taxa observed in their parental lines, our  
430 approach indicates that host genetic composition is sufficient to predict an impact on  
431 overall rhizosphere community structure. Besides validating our genetic mapping,  
432 this observation is aligned to recent observations of sorghum genotypes<sup>41</sup>. Second,  
433 the same lines allowed us to determine that allelic variation at *QRMC-3HS* does not  
434 perturb the composition of fungal members of the community. Although this feature  
435 is distinct to observations in a genome-wide investigation of root-associated  
436 communities of *Arabidopsis*<sup>47</sup>, our finding is consistent with recently reported results  
437 for the rhizosphere microbiota of maize, where individual host genes shaped the  
438 bacterial but not the fungal microbiota<sup>10</sup>. Third, once we characterised these lines for  
439 additional traits that could be intuitively considered to be implicated in shaping the  
440 microbiota in the barley rhizosphere, such as root system architecture<sup>30</sup> and  
441 rhizodeposition of primary metabolites<sup>48</sup>, we failed to identify significant associations  
442 between these traits and allelic composition at *QRMC-3HS*. While differences in the  
443 genetic background of the tested plants prevent us from drawing firm conclusions  
444 when considering these studies, our observations suggest that *QRMC-3HS* may  
445 code for a distinct component of the host genetic control of barley microbiota  
446 recruitment.

447 We therefore employed a root RNA-seq experiment to gain mechanistic insights into  
448 the regulation of the microbiota mediated by *QRMC-3HS*. One of the candidate  
449 genes found to be significantly up-regulated in plants harbouring elite alleles at  
450 *QRMC-3HS* putatively encodes an NLR protein<sup>49</sup>. This class of protein represents

451 one of the two main groups of immune receptors capable of selectively recognising  
452 and terminating microbial proliferation via effector recognition<sup>50</sup>. The gene we  
453 identified encodes a predicted protein consisting of a Rx-type coiled-coil-nucleotide-  
454 binding site-leucine-rich repeat (CC-NLR) domains, containing a putative integrated  
455 domain encompassing ankyrin repeats anchoring an NPR1-like (NONEXPRESSOR  
456 OF PATHOGENESIS-RELATED GENES 1) domain. This type of integrated *NLR*  
457 gene has recently been identified in the wheat genome<sup>51,52</sup>. The integrated domains  
458 may work as decoys, mimicking an effector target and enabling microbial  
459 recognition<sup>53,54</sup>. The *NPR1* gene is a key transcriptional regulator for plant defence  
460 responses related to the hormone salicylic acid (SA)<sup>55</sup>. Besides its canonical role in  
461 pathogen protection<sup>56,57</sup>, it is important to note that *npr1* mutants, impaired in SA  
462 perception, fail to recruit a root microbiota comparable with their cognate wild-type  
463 plants<sup>58</sup>. A so-called resistance gene analogue sharing structural features with *bona*  
464 *fide* *NLR* genes has been identified among the candidate genes underpinning the  
465 establishment of the bacterial microbiota in sorghum<sup>41</sup>, further suggesting the  
466 possible significance of these genes for bacterial recruitment in the rhizosphere. A  
467 distinctive feature of the *NLR* gene identified in our study is that it lies in a region of  
468 structural variation of the barley genome: for instance, the cultivar Morex, often used  
469 as a reference for microbiota investigations<sup>25,26,31</sup> lacks a copy of this gene. The use  
470 of the single barley reference genome available prior to 2020<sup>59,60</sup>, would have  
471 prevented us from identifying this priority candidate gene.

472 Two other genes within the *QRMC-3HS* were considered among our primary  
473 candidates. The first is a gene that is differentially regulated between sibling lines  
474 harbouring contrasting microbiotas. As it encodes an unknown protein, we cannot  
475 hypothesise its mechanistic contribution to plant-microbe interactions in the  
476 rhizosphere. The second is a xyloglucan endotransglucosylase/hydrolase enzyme  
477 (XTH), characterised by a frame shift variant close to the 5' end of the CDS in the  
478 wild-like line 124\_52. XTH enzymes are widely conserved across plant lineages  
479 where they are responsible for cleavage and/or re-arrangement of xyloglucans<sup>61,62</sup>,  
480 the most abundant hemicellulosic polysaccharides in primary cell walls<sup>63</sup>. In  
481 *Arabidopsis*, cell wall features are a recruitment cue for nearly half of the  
482 endogenous root microbiota<sup>64</sup> and cell wall modifications underpin some of the gene  
483 ontology categories identified in genome-wide association mapping experiments

484 conducted with this plant<sup>39</sup>. A recent investigation conducted using a so-called ‘split-  
485 root’ approach demonstrated that genes encoding XTH were down-regulated in roots  
486 exposed to a high-density microbiome (*i.e.*, akin to natural soil conditions)<sup>65</sup>. Despite  
487 not identifying a significant phenotype of the macroscale root system architecture of  
488 our sibling lines, whereby XTH may play a primary role, this gene may still contribute  
489 to microbiota recruitment via modification of cell wall polysaccharides, a critical  
490 checkpoint in molecular plant-microbe interactions<sup>66</sup>. An additional contribution of  
491 *XTH* genes to host-microbiota interactions may be represented by an increased  
492 adaptation to soil chemical and physical conditions. For instance, *XTH* genes have  
493 previously been implicated in abiotic stress tolerance, including drought, salt stress  
494 and cold acclimation<sup>68-70</sup>. As wild barley accessions have evolved under marginal  
495 soil conditions, these may have imposed a selective pressure on the genetic  
496 diversity of *XTH* genes, which, in turn, may have led to a differential microbial  
497 recruitment.

498 As microbiota profiling has not been featuring in breeding programmes, it is  
499 legitimate to hypothesize that polymorphisms at candidate genes shaping  
500 rhizosphere microbial communities mirror a selection for other, genetically linked,  
501 agronomic traits. The observation that *QRMC-3HS* is adjacent to a major QTL for  
502 yield-related traits previously identified on chromosome 3H using the same genetic  
503 material (*QRMC-3HS*; 38.7-40.6 cM; yield QTL, 40.7-43.9 cM)<sup>67-69</sup> may support this  
504 scenario. Selection for yield traits may have inadvertently introduced a gene  
505 impacting the microbiota. An alternative, and not mutually exclusive, scenario is that  
506 disease resistance may have been the trait under agronomic selection. This would  
507 be in line with a recent investigation which demonstrated that bacteria isolated from  
508 the barley rhizosphere mediated the establishment of both pathogenic and  
509 mutualistic fungi in roots<sup>73</sup>. In this scenario, selection at *QRMC-3HS* may contribute  
510 to the fine-tuning of these multitrophic interactions. However, investigations  
511 conducted in maize indicate that plant disease resistance is not a reliable predictor of  
512 the composition of the phyllosphere microbiota<sup>74</sup> (*i.e.*, the microbial communities  
513 populating above-ground plant tissues), suggesting that the activity of individual  
514 genetic determinants of the microbiota may be fine-tuned by plant organ-specific  
515 mechanisms<sup>75</sup>. Recent innovations in barley genetics<sup>76-79</sup> will facilitate the



516 development of refined genetic material required to probe these scenarios  
517 experimentally.

518 In conclusion, by characterising an experimental population between wild and elite  
519 genotypes for rhizosphere microbiota composition, we have identified a putative  
520 major plant genetic determinant of the barley microbiota on chromosome 3H. Within  
521 the associated interval we have discovered three priority candidate genes, coding for  
522 an unknown function protein, an NLR and a XTH enzyme, respectively. These are  
523 putatively required for microbiota establishment in wild and cultivated barley  
524 genotypes. The latter two proteins have previously been implicated as putative  
525 regulators of the microbiota in other plant species. A striking observation derived  
526 from our investigation is that one of these candidate genes, the *NLR*, exists in a  
527 highly dynamic region of the barley genome, suggesting that selection for agronomic  
528 traits may have led to a divergent microbiota in elite cultivars. Our approach can be  
529 readily used to identify other or additional candidate genes from reference-quality  
530 genomes, including wild ancestors, as they become available for experimentation, in  
531 barley and other species. We therefore advocate the use of dedicated plant genetic  
532 resources to resolve plant-microbiota interactions at the gene level and accelerate  
533 their applications for sustainable crop production.

## 534 **Methods**

### 535 **Plants**

536 Barley plants from family 15 of the nested-association mapping population (NAM)  
537 HEB-25<sup>27</sup> were used in this investigation. We developed the sibling lines 124\_52  
538 (wild-like) and 124\_17 (elite-like), with contrasting haplotypes wild and elite at the  
539 *QRMC-3HS*, by selfing the line HEB\_15\_124 which was heterozygous at the locus of  
540 interest. All lines used were genotyped using a combination of KASP markers and  
541 Infinium iSelect 9K and 50K SNPs arrays platforms. Barley plants used in this study  
542 along with the genetic information are summarized in [Supplementary Data 3](#).

### 543 **Plants growth conditions and rhizosphere fractionation**

544 Barley seeds were surface sterilized and pre-germinated as previously reported<sup>26</sup>.  
545 Germinated seeds with comparable rootlets were sown in individual 400 mL pots  
546 filled with a sieved (15 mm) reference agricultural soil previously used for barley-

547 microbiota investigations and designated Quarryfield<sup>26,30,31</sup>. The number of replicates  
548 varies according to the experiment: the mapping experiment n=4 for the parental  
549 lines and n=2 for each of the segregating lines, whereas in the sibling lines we used  
550 n=10. Unplanted soil pots were included in each experiment and designated bulk soil  
551 controls. Plants were grown until stem elongation (~5 weeks, Zadoks 30–35 cereal  
552 growth stage) under controlled environmental conditions as described in<sup>31</sup>. At this  
553 developmental stage, plants were uprooted from the soil, stems were detached from  
554 the uppermost 6 cm of the root system which, upon removal of large soil aggregates,  
555 was subjected to a combination of washing and vortexing to dislodge rhizosphere  
556 fractions as previously described<sup>31</sup>.

### 557 [Assessment of root and yield traits](#)

558 Agronomic traits related to yield, brittle rachis and root architecture were assessed  
559 for the sibling lines. Main tiller seeds grown in Quarryfield soil (n=5-8 ,4 independent  
560 replicates) were used to measure yield with a MARVIN seed analyser  
561 ([Supplementary Fig. 11](#)). Brittle rachis in *Btr1* and *Btr2* gene mutations were  
562 assessed using KASP markers designed on *Btr* genomic sequences<sup>78</sup>. Root  
563 architecture factors were studied for n=4 plants at early stem elongation for  
564 consistency with the microbial rhizosphere experiments ([Supplementary Table 7](#)).  
565 Roots were thoroughly washed and kept in phosphate buffered saline solution (PBS)  
566 until processing. Root systems were scanned and analysed using WinRHIZO  
567 software (Regent Instruments Inc.). Shoot and root dry weights were determined by  
568 drying the samples in the oven at 70 °C for 48 h. Specific root length (cm/g) and  
569 specific root area (cm<sup>2</sup>/g) were calculated according to<sup>18</sup>. Normality was assessed  
570 by Shapiro-Wilk test. Significance was tested with a Kruskal-Wallis or an ANOVA  
571 test according to data distribution.

### 572 [Barley root exudates metabolic profiling](#)

573 We developed a protocol to characterise primary metabolites from sand-grown  
574 barley plants<sup>79</sup> Briefly, 3 barley plantlets were sown in a 400 mL plastic pot filled with  
575 approx. 300 g of pre-sterilized silver sand and organised in the glasshouse in  
576 randomized blocks design (n=15 per genotype/ block). Barley nutrient solution 100  
577 %<sup>80</sup> was applied to each pot (50 mL at 48 h intervals) and in the last week, a 25 %  
578 nitrogen barley nutrient solution<sup>80</sup> was applied. After 2 and 3 weeks and following the

579 randomized block design, barley roots were carefully taken out of the pots, and the  
580 sand around the roots was washed off with water. Using a plastic jar (100 mL vol),  
581 root exudates were collected using 3 plants from the same genotype per jar. The  
582 washed plant roots were submerged in 50 mL sterilized distilled water and were left  
583 to exude for 6 to 7 h. Unplanted controls were generated by washing through the  
584 unplanted sand with sterilized distilled water collecting 50 mL, which were processed  
585 identically to the exudates. The root exudates (100 mL) and unplanted controls were  
586 collected in clean plastic jars, filtered (cellulose Whatman No. 42) and 100 µL of 2  
587 mg/mL erythritol solution (extraction standard for GC/MS) was added to each jar.  
588 The exudate solution was frozen at -80 °C and subsequently concentrated to powder  
589 form by freeze-drying for 4 days. The experiment was harvested on four consecutive  
590 days approximately between 11 AM and 6 PM. Freeze-dried exudates (5 mg) were  
591 pooled per genotype and block (n=4) and analysed by an Elemental analyser for  
592 total carbon and nitrogen quantification using the Dumas method<sup>81</sup>, while 20 mg of  
593 the same samples were used to perform a semiquantitative GC/MS analysis as  
594 previously described<sup>82</sup>.

595 Metabolite profiles were acquired using a GC–MS (DSQII Thermo-Finnigan Tempus  
596 GC–(TOF)–MS system, UK) system carried on a DB5-MS column (15 m x 0.25 mm  
597 x 0.25 µm, J&W, Folsom, CA, USA). Data were acquired using the XCALIBUR  
598 (Thermo Scientific, Waltham, MA, USA) software package V. 2.0.7. Semiquantitative  
599 data was acquired by integrating selected ion chromatographic peaks.

600 Data distribution of individual compounds was assessed by Shapiro-Wilk test.  
601 Significance was tested with a Kruskal-Wallis with post-hoc Dunn test (FDR  
602 corrected) or an ANOVA test followed by a Tukey post hoc test according to data  
603 distribution.

#### 604 [Bacterial and fungal DNA quantification](#)

605 Bacterial and fungal DNA fractions (total DNA abundance) were quantified in the  
606 rhizosphere of the sibling lines by quantitative real-time polymerase chain reaction.  
607 Rhizosphere DNA samples were diluted to 10 ng/µL and serial dilutions were  
608 applied. A final concentration of 0.1 ng/µL was employed for both the Femto Fungal  
609 DNA Quantification Kit and Femto Bacterial DNA Quantification Kit (Zymo Research)  
610 according to the manufacturer protocol. The sibling lines DNA samples were

611 randomized in 96 well plates, using a minimum of 10 biological replicates per  
612 treatment. Quantification was performed in a StepOne thermocycler (Applied  
613 Biosystems by Life Technology). Data distribution of the DNA samples was  
614 assessed by Shapiro-Wilk test. Significance was tested with a Kruskal-Wallis with  
615 post-hoc Dunn test (FDR corrected).

#### 616 [Preparation of 16S rRNA gene and / ITS amplicon pools and Illumina 16S rRNA and](#) 617 [ITS gene amplicon sequencing](#)

618 16S rRNA and ITS data from the barley rhizospheres were determined using  
619 previously described protocols<sup>31</sup>. The 515F (GTGCCAGCMGCCGCGGTAA)-806R  
620 (GGACTACHVGGGTWTCTAAT) primer pair<sup>83</sup> were used for amplifying 16S rRNA  
621 sequences, while the PCR primers ITS1F (CTTGGTCATTTAGAGGAAGTAA)-ITS2  
622 (GCTGCGTTCTTCATCGATGC) were used for the ITS library<sup>84,85</sup>. Paired-end  
623 Illumina sequencing was performed using the Illumina MiSeq system (2x 150 bp  
624 reads) as indicated in <sup>31</sup>. Library pool quality was assessed using a Bioanalyzer  
625 (High Sensitivity DNA Chip; Agilent Technologies) and quantified using a Qubit  
626 (Thermo Fisher) and qPCR (Kapa Biosystems, Wilmington, USA). Amplicon libraries  
627 were spiked with 15 % of a 4 pM phiX control solution. The resulting high-quality  
628 libraries were run at 10 pM final concentration.

#### 629 [Amplicon sequencing reads processing](#)

630 Quality assessment and DADA2 version 1.10<sup>86</sup> and R 3.5.1<sup>87</sup> was used to generate  
631 the ASVs following the basic methodology outlined in the 'DADA2 Pipeline Tutorial  
632 (1.10)' and it is explained in detail in<sup>31</sup>. Subsequently, sequences classified as  
633 'Chloroplast' or 'Mitochondria' from the host plant were pruned in silico. Additional  
634 pruning was carried out, removing ASVs matching a list of potential contaminants of  
635 the lab<sup>88</sup>. Next, we merged the library used for genetic mapping with the library of the  
636 sibling lines to perform simultaneous processing of both libraries creating a single  
637 new Phyloseq object. Further filtering criterion was applied, low count ASVs were  
638 pruned from the merged libraries (at least 20 reads in 2 % of the samples), retaining  
639 93 % of the initial reads ([Supplementary Fig. 1](#)). This dataset was rarefied at equal  
640 sequencing depth across samples (10500 reads) and agglomerated at genus and  
641 family taxonomic levels. Finally, the resulting Phyloseq object was subsetted by the  
642 corresponding library for downstream analyses.

643 The mapping 16S rRNA gene amplicon library merged with the sibling lines library  
644 allowed us to identify 2,189 individual ASVs from a total of 8,219,883 sequencing  
645 reads after filtering and taxonomic identification against the SILVA 138 database<sup>89</sup>.  
646 While the sibling lines ITS rRNA amplicon sequencing library was generated  
647 identifying 216 individual ASVs from a total of 4,641,285 sequencing reads after  
648 filtering and taxonomic identification against the Unite 04.02.2020 database<sup>90</sup>.

#### 649 [Calculation of alpha-, beta-diversity indices and differential abundance between](#) 650 [rhizospheres](#)

651 Alpha-diversity richness was estimated as described in<sup>31</sup>. Beta-diversity analysis was  
652 carried out by calculating the dissimilarities among microbial communities using the  
653 rarefied data with the Bray-Curtis index as described in<sup>31</sup>. For ITS, the Bray-Curtis  
654 dissimilarity matrix was square-root transformed to allow visualization since all the  
655 samples appeared agglomerated in the PCoA visualization. DESeq2 was used to  
656 perform microbial differential abundance analysis to identify genera differentially  
657 enriched between pair-wise comparisons by Wald test (False Discovery Rate, FDR <  
658 0.05)<sup>91</sup>.

#### 659 [QTL mapping of bacterial microbiota phenotype](#)

660 Following the analysis of microbial differential abundance (DESeq2) between wild  
661 and elite parental lines, ASVs enriched in the wild or elite parents were recapitulated  
662 in the segregant population for further mapping. Association between microbial  
663 abundances and loci of the barley genome was conducted using the package R/qtl<sup>92</sup>  
664 and the function *scanone*, with the expectation-maximization (EM) algorithm  
665 implementing interval mapping considering only a single-QTL model. The LOD  
666 genome-wide significance threshold was set at 20 % adjusted per taxa using 1,000  
667 permutations. The loci, shown in [Fig. 2](#), were selected based on marker regression  
668 analysis or their LOD scores genome adjusted per taxa ([Supplementary Table 1 and](#)  
669 [2](#)) (functions *makeqtl*, *fitqtl* and *plotPXG*). The delimitation of the different loci was  
670 performed by applying the Bayes credible interval method with confidence intervals  
671 at 95 % (function *bayestint*<sup>93</sup>) ([Supplementary Table 3-5](#)). The percentage of  
672 explained variance ( $R^2$ ) was calculated per individual phenotype (taxa), at the  
673 flanking maker of the interval upper part, corresponding to each of the individual taxa  
674 mapping at this position, which is summarized in [Supplementary Table 3-5](#).

## 675 Transcriptomic analyses (RNA-seq) of the sibling lines

676 Roots from the cultivar Barke and the sibling lines were processed as described  
677 above. Briefly, biological replicates of the different genotypes (n=15) were grown in a  
678 random matrix in pots filled with Quarryfield soil and maintained in the glasshouse for  
679 5 weeks in a randomised arrangement. The uppermost 6 cm of the root system were  
680 processed as described in 'rhizosphere fractionation'. For harvesting root samples,  
681 following vortexing the root system to remove the soil/rhizosphere fractions in PBS,  
682 roots were collected with sterile forceps, excess PBS gently removed using a clean  
683 paper towel and immediately flash-frozen in liquid nitrogen until processed. All the  
684 root systems were collected in three consecutive days between 10 AM and 4 PM,  
685 reflecting the time necessary to process root samples.

686 RNA was extracted from individual root systems with the Macherey-Nagel™  
687 NucleoSpin™ RNA, Mini Kit (Thermo Fisher, USA) following the manufacturer's  
688 protocol, including the Plant RNA Isolation Aid Invitrogen (Thermo Fisher, USA) for  
689 the sample lysis step using 90 µL of Plant RNA Isolation Aid, mixed with 870 µL of  
690 RA1 buffer and 40 µL of dithiothreitol (DTT). RNA quality was assessed using an  
691 Agilent 2100 Bioanalyzer or TapeStation (Agilent, USA). Samples for sequencing  
692 were selected based on microbiota profiles and the quality of the RNA sample.

693 Approximately, 2 µg of total RNA per sample (n=18) was submitted to Genewiz for  
694 Illumina sequencing. Total RNA (300 ng) was further purified using the NEBNext  
695 mRNA Magnetic Isolation Module (NEB). Library preparation was carried out using  
696 the NEBNext® Ultra™ II Directional RNA Library Prep with Sample Purification  
697 Beads and indexed with NEBNext Multiplex Oligos for Illumina (96 Unique Dual  
698 Index Primer Pairs set 1). Next-Generation sequencing was carried out on an  
699 Illumina NovaSeq 6000 using an SP, 300 cycles, flow cell with 2 x 150 bp paired-end  
700 reads. The library was stranded with a sequencing depth of 40 M reads per sample.

## 701 Differential expression analysis of RNA-seq

702 Downstream data pre-processing and analysis for both transcript quantification and  
703 variant calling was carried out using snakemake<sup>94</sup>. The barley reference  
704 transcriptome (v2.18) for the cultivar Barke was obtained from  
705 [https://ics.hutton.ac.uk/barleyrtd/bart\\_v2\\_18.html](https://ics.hutton.ac.uk/barleyrtd/bart_v2_18.html). Raw reads were trimmed using  
706 trim galore (<https://github.com/FelixKrueger/TrimGalore>) version 0.6.6 with

707 parameters “-q 20 -Illumina -paired”. Transcript quantification was carried out using  
708 Salmon<sup>95</sup> version 1.4.0 using parameters “-l A --seqBias -posBias -  
709 validateMappings” with BaRTv2.18<sup>29</sup> as the reference transcriptome. Analysis of  
710 RNA-seq quantifications was carried out using a custom modified version of the 3D  
711 RNAseq pipeline<sup>96</sup>. The tximport R package version 1.10.0 was used to import  
712 transcript TPM values and generate gene TPM values<sup>97</sup>. Low expressed transcripts  
713 and genes were filtered based on analysing the data mean-variance trend. The  
714 expected decreasing trend between data mean and variance was observed when  
715 transcripts which had < 3 of the 15 samples with counts per million reads of 2 were  
716 removed, which provided an optimal filter of low expression. A gene was counted as  
717 expressed and included in the downstream differential expression (DE) analysis if  
718 any of its transcripts met the above criteria. The TMM method was used to normalise  
719 the gene and transcript read counts to -CPM<sup>98</sup>. The R package umap ([https://cran.r-  
720 project.org/web/packages/umap/vignettes/umap.html](https://cran.r-project.org/web/packages/umap/vignettes/umap.html)) implementing the umap  
721 algorithm<sup>99</sup> was used to visualise the expression data. It was found that sample date  
722 influenced gene expression and so this was incorporated into the EdgeR linear  
723 model as a block effect.

724 DE analysis was carried out using the R package EdgeR<sup>100</sup> version 3.32.0. The  
725 EdgeR generalised linear model quasi-likelihood (glmQL) method was used, with  
726 genotype and date of sampling used as terms in the model (~0 + genotype +  
727 sampling.date). Contrast groups were set to 124\_17-Barke, 124\_52-Barke and  
728 124\_52-124\_17. *P*-values were corrected using the Benjamini-Hochberg method to  
729 correct the false discovery rate<sup>101</sup>. Genes were considered to be DE if they had an  
730 adjusted *P*-value < 0.01 and a Log2FC >=1 or <=-1 (Fig.4, 5 and Supplementary  
731 [Figures 13-18](#)).

### 732 [Variant calling](#)

733 For variant calling the trimmed Illumina reads were combined according to genotype  
734 (Barke, 124\_17 or 124\_52) using the Linux cat command (forward and reverse reads  
735 in separate files). Mapping was carried out against the barley Barke genome<sup>28</sup> with  
736 STAR version 2.7.9<sup>102</sup>. To aid with read mapping, a BaRTv2.18 gtf file was used with  
737 the “genomeGenerate” mode. After an initial round of mapping was carried out,  
738 splice junctions from each of the genotypes were collated and filtered using a custom

739 script, removing splice junctions with non-canonical dinucleotide sequences, those  
740 with a read depth < 4 and a max overhang < 10 bp. The filtered splice junction set  
741 was used as input for a second round of mapping.

742 Mapped read files (.bam files) were pre-processed prior to variant calling using  
743 Opossum<sup>103</sup> with settings “SoftClipsExist True”. Variant calling was carried out using  
744 Platypus<sup>104</sup> with the barley Barke genome as a reference, and with settings “--  
745 filterDuplicates 0 --minMapQual 0 --minFlank 0 --maxReadLength 500 --  
746 minGoodQualBases 10 --minBaseQual 20”. Variant calling files (VCF) were merged  
747 using bcftools merge and filtered to remove variants outside the *QRMC-3HS* locus  
748 (Barke chr3H: 33,181,340 – 36,970,860 bp). The resulting *QRMC-3HS* VCF was  
749 filtered to only keep variants above the quality threshold, and where genotypes  
750 Barke and 124\_17 (elite-like) were called as reference alleles and 124\_52 (wild-like)  
751 was called as the alternative alleles. InterProScan version 5.48-83.0 (version 83.0  
752 data) was used to predict functional domains of predicted proteins from transcripts.

### 753 [MUMmer alignment](#)

754 To ascertain the physical position of *QRMC-3HS* in each genome, the sequences of  
755 two markers flanking the locus (*i.e.*, SCRI\_RS\_141171 and SCRI\_RS\_154747) were  
756 aligned to reference genomes from the pan-genome<sup>28</sup> using BLAST<sup>28,105</sup> with default  
757 parameters. The best alignment for each flanking marker was selected as the  
758 physical position in each case. For the purposes of visualisation, these numbers  
759 were rounded to the nearest Mb. The sequence +/- 2Mb on either side of the flanking  
760 markers was extracted from each genome using a custom python script. The  
761 program NUCmer from the MUMmer suite<sup>106</sup> was used to align the *QRMC-3HS*  
762 sequence from each of the pan-genome lines against the *QRMC-3HS* sequence of  
763 Barke with settings “dnadiff”. The resulting delta file was filtered using delta-filter with  
764 the settings “-l 95 -l 1000 -g”, resulting in all alignments with less than 95 % identity  
765 and lengths of less than 1,000 bp being removed. The program mummerplot was  
766 then used to create figures ([Fig. 6 and Supplementary Fig. 20](#)).

### 767 [NLR diagnostic marker](#)

768 The *NLR* candidate gene diagnostic PCR marker was designed to amplify the  
769 flanking region of an 18 nt deletion located in the fourth intron of the predicted gene  
770 in line 124\_52 compared with the elite parent Barke ([Supplementary Fig. 21](#)).



771 Seedlings of the barley genotypes of the pangenome collection<sup>28</sup> were grown under  
772 controlled conditions and young leaves subjected to DNA extraction using the  
773 DNeasy Qiagen Plant Kit. The primers designated ‘forward’  
774 (GCCTTTTCAGCAAGATGCCG) and ‘reverse’ (GTACTCCCTCCGCTCCAAAAT)  
775 were used to perform PCR amplifications with the Kapa HiFi HotStart PCR kit (Kapa  
776 Biosystems, Roche). The reactions were performed in a SimpliAmp Thermal Cycler  
777 (Applied Biosystems) using the following conditions: 94 °C (3 min), followed by 30  
778 cycles of 98 °C (30 s) denaturing, 65 °C (30 s) annealing, 72 °C (30 s) elongation  
779 and a final elongation step of 72 °C (10 min). PCR amplicons were separated and  
780 visualised in a 2 % agarose gel (Figure 7 c).

## 781 Data Availability

782 The raw sequence data collected in this study have been deposited in the European  
783 Nucleotide Archive (ENA) accession number [PRJEB50061](#). Source data to generate  
784 individual figures and computational analysis are provided with this paper. The  
785 barley reference transcriptome (v2.18) for the cultivar Barke was obtained from  
786 [https://ics.hutton.ac.uk/barleyrtd/bart\\_v2\\_18.html](https://ics.hutton.ac.uk/barleyrtd/bart_v2_18.html). Pseudomolecules of individual  
787 barley genomes were downloaded from [https://webblast.ipk-  
788 gatersleben.de/downloads/barley\\_pangenome/](https://webblast.ipk-gatersleben.de/downloads/barley_pangenome/).

## 789 Code Availability

790 The codes to reproduce the figures and statistical analyses reported in this  
791 manuscript were deposited under a DOI<sup>107</sup> in the GitHub repository and are  
792 accessible at [https://github.com/BulgarelliD-Lab/Microbiota\\_mapping](https://github.com/BulgarelliD-Lab/Microbiota_mapping).

## 793 Competing interest

794 The authors declare no competing interests.

## 795 References

- 796 1. Berendsen, R. L. *et al.* Disease-induced assemblage of a plant-beneficial  
797 bacterial consortium. *The ISME Journal* 2018 12:6 12, 1496–1507 (2018).
- 798 2. Hacquard, S., Spaepen, S., Garrido-Oter, R. & Schulze-Lefert, P. Interplay  
799 between innate immunity and the plant microbiota. *Annual review of*  
800 *phytopathology* 55, 565–589 (2017).
- 801 3. Lu, T. *et al.* Rhizosphere microorganisms can influence the timing of plant  
802 flowering. *Microbiome* 6, (2018).

- 803 4. Verbon, E. H. & Liberman, L. M. Beneficial microbes affect endogenous  
804 mechanisms controlling root development. *Trends in Plant Science* **21**, 218–  
805 229 (2016).
- 806 5. York, L. M., Carminati, A., Mooney, S. J., Ritz, K. & Bennett, M. J. The holistic  
807 rhizosphere: integrating zones, processes, and semantics in the soil influenced  
808 by roots. *Journal of Experimental Botany* **67**, 3629–3643 (2016).
- 809 6. Kamada, N., Chen, G. Y., Inohara, N. & Núñez, G. control of pathogens and  
810 pathobionts by the gut microbiota. *Nature immunology* **14**, 685 (2013).
- 811 7. Lugtenberg, B. & Kamilova, F. Plant-growth-promoting rhizobacteria. *Annual*  
812 *Review of Microbiology* **63**, 541–556 (2009).
- 813 8. Alegria Terrazas, R. *et al.* Plant-microbiota interactions as a driver of the  
814 mineral turnover in the rhizosphere. *Advances in applied microbiology* **95**, 1–  
815 67 (2016).
- 816 9. Stringlis, I. A. *et al.* MYB72-dependent coumarin exudation shapes root  
817 microbiome assembly to promote plant health. *Proceedings of the National*  
818 *Academy of Sciences of the United States of America* **115**, E5213–E5222  
819 (2018).
- 820 10. Yu, P. *et al.* Plant flavones enrich rhizosphere Oxalobacteraceae to improve  
821 maize performance under nitrogen deprivation. *Nature plants* **7**, 481–499  
822 (2021).
- 823 11. Bulgarelli, D. *et al.* Structure and functions of the bacterial microbiota of plants.  
824 *Annual Review of Plant Biology* **64**, 807–838 (2013).
- 825 12. Hacquard, S. *et al.* Microbiota and host nutrition across plant and animal  
826 kingdoms. *Cell Host and Microbe* **17**, 603–616 (2015).
- 827 13. Schlaeppi, K. & Bulgarelli, D. The plant microbiome at work. *Molecular Plant*  
828 *Microbe Interactions* **28**, 212–217 (2015).
- 829 14. Escudero-Martinez, C. & Bulgarelli, D. Tracing the evolutionary routes of plant-  
830 microbiota interactions. *Current opinion in microbiology* **49**, 34–40 (2019).
- 831 15. Cordovez, V., Dini-Andreote, F., Carrión, V. J. & Raaijmakers, J. M. Ecology  
832 and evolution of plant microbiomes. *Annual Review of Microbiology* **73**, 69–88  
833 (2019).
- 834 16. Edwards, J. *et al.* Structure, variation, and assembly of the root-associated  
835 microbiomes of rice. *Proceedings of the National Academy of Sciences of the*  
836 *United States of America* **112**, E911–E920 (2015).
- 837 17. Leff, J. W., Lynch, R. C., Kane, N. C. & Fierer, N. Plant domestication and the  
838 assembly of bacterial and fungal communities associated with strains of the  
839 common sunflower, *Helianthus annuus*. *New Phytologist* **214**, 412–423 (2017).

- 840 18. Pérez-Jaramillo, J. E. *et al.* Linking rhizosphere microbiome composition of  
841 wild and domesticated *Phaseolus vulgaris* to genotypic and root phenotypic  
842 traits. *The ISME Journal* 2017 11:10 **11**, 2244–2257 (2017).
- 843 19. Pérez-Jaramillo, J. E. *et al.* Deciphering rhizosphere microbiome assembly of  
844 wild and modern common bean (*Phaseolus vulgaris*) in native and agricultural  
845 soils from Colombia. *Microbiome* **7**, 1–16 (2019).
- 846 20. Spor, A. *et al.* Domestication-driven changes in plant traits associated with  
847 changes in the assembly of the rhizosphere microbiota in tetraploid wheat.  
848 *Scientific Reports* 2020 10:1 **10**, 1–12 (2020).
- 849 21. Hassani, M. A., Özkurt, E., Franzenburg, S. & Stukenbrock, E. H. Ecological  
850 assembly processes of the bacterial and fungal microbiota of wild and  
851 domesticated wheat species. *Phytobiomes Journal* **4**, 217–224 (2020).
- 852 22. Tkacz, A. *et al.* Agricultural selection of wheat has been shaped by plant-  
853 microbe interactions. *Frontiers in Microbiology* **11**, 132 (2020).
- 854 23. Wipf, H. M. L. & Coleman-Derr, D. Evaluating domestication and ploidy effects  
855 on the assembly of the wheat bacterial microbiome. *PLOS ONE* **16**, e0248030  
856 (2021).
- 857 24. Newton, A. C. *et al.* Crops that feed the world 4. Barley: a resilient crop?  
858 Strengths and weaknesses in the context of food security. *Food Security* 2011  
859 3:2 **3**, 141–178 (2011).
- 860 25. Bulgarelli, D. *et al.* Structure and function of the bacterial root microbiota in  
861 wild and domesticated barley resource. *Cell Host & Microbe* **17**, 392–403  
862 (2015).
- 863 26. Alegria Terrazas, R. *et al.* A footprint of plant eco-geographic adaptation on the  
864 composition of the barley rhizosphere bacterial microbiota. *Scientific Reports*  
865 2020 10:1 **10**, 1–13 (2020).
- 866 27. Maurer, A. *et al.* Modelling the genetic architecture of flowering time control in  
867 barley through nested association mapping. *BMC Genomics* 2015 16:1 **16**, 1–  
868 12 (2015).
- 869 28. Jayakodi, M. *et al.* The barley pan-genome reveals the hidden legacy of  
870 mutation breeding. *Nature* 2020 588:7837 **588**, 284–289 (2020).
- 871 29. Coulter, M. *et al.* BaRTv2: A highly resolved barley reference transcriptome for  
872 accurate transcript-specific RNA-seq quantification. *bioRxiv*  
873 2021.09.10.459729 (2021).
- 874 30. Robertson-Albertyn, S. *et al.* Root hair mutations displace the barley  
875 rhizosphere microbiota. *Frontiers in Plant Science* **8**, 1094 (2017).
- 876 31. Maver, M. *et al.* Applications of the indole-alkaloid gramine modulate the  
877 assembly of individual members of the barley rhizosphere microbiota. *PeerJ*  
878 **9**:e12498 (2021).

- 879 32. Bayer, M. M. *et al.* Development and evaluation of a barley 50k iSelect SNP  
880 array. *Frontiers in Plant Science* **8**, 1792 (2017).
- 881 33. Bais, H. P., Weir, T. L., Perry, L. G., Gilroy, S. & Vivanco, J. M. The role of root  
882 exudates in rhizosphere interactions with plants and other organisms. *Annual*  
883 *Review of Plant Biology* **57**, 233–266 (2006).
- 884 34. Vives-Peris, V., de Ollas, C., Gómez-Cadenas, A. & Pérez-Clemente, R. M.  
885 Root exudates: from plant to rhizosphere and beyond. *Plant Cell Reports* **2019**  
886 *39:1* **39**, 3–17 (2019).
- 887 35. Fagorzi, C. *et al.* Nonadditive Transcriptomic Signatures of Genotype-by-  
888 Genotype Interactions during the Initiation of Plant-Rhizobium Symbiosis.  
889 *mSystems* **6**, (2021).
- 890 36. Li, X., Rui, J., Mao, Y., Yannarell, A. & Mackie, R. Dynamics of the bacterial  
891 community structure in the rhizosphere of a maize cultivar. *Soil Biology and*  
892 *Biochemistry* **68**, 392–401 (2014).
- 893 37. Sharma, R. *et al.* Genome-wide association of yield traits in a nested  
894 association mapping population of barley reveals new gene diversity for future  
895 breeding. *Journal of Experimental Botany* **69**, 3811–3822 (2018).
- 896 38. Takahashi R, H. J. Linkage study of two complementary genes for brittle rachis  
897 in barley. *Ber Ohara Inst Landwirtsch Biol Okayama Univ* **12–99**, 105 (1964).
- 898 39. Cingolani, P. *et al.* A program for annotating and predicting the effects of single  
899 nucleotide polymorphisms, SnpEff: SNPs in the genome of *Drosophila*  
900 *melanogaster* strain w1118; iso-2; iso-3. *Fly (Austin)* **6**, 80–92 (2012).
- 901 40. Horton, M. W. *et al.* Genome-wide association study of *Arabidopsis thaliana*  
902 leaf microbial community. *Nature Communications* **2014 5:1** **5**, 1–7 (2014).
- 903 41. Wallace, J. G., Kremling, K. A., Kovar, L. L. & Buckler, E. S. Quantitative  
904 genetics of the maize leaf microbiome. *Phytobiomes Journal* **2**, 208–224  
905 (2018).
- 906 42. Deng, S. *et al.* Genome wide association study reveals plant loci controlling  
907 heritability of the rhizosphere microbiome. *The ISME Journal* **2021 15:11** **15**,  
908 3181–3194 (2021).
- 909 43. Bai, Y. *et al.* Functional overlap of the *Arabidopsis* leaf and root microbiota.  
910 *Nature* **2015 528:7582** **528**, 364–369 (2015).
- 911 44. Levy, A., Conway, J. M., Dangl, J. L. & Woyke, T. Elucidating bacterial gene  
912 functions in the plant microbiome. *Cell Host & Microbe* **24**, 475–485 (2018).
- 913 45. Agler, M. T. *et al.* Microbial hub taxa link host and abiotic factors to plant  
914 microbiome variation. *PLOS Biology* **14**, e1002352 (2016).
- 915 46. Niu, B., Paulson, J. N., Zheng, X. & Kolter, R. Simplified and representative  
916 bacterial community of maize roots. *Proceedings of the National Academy of*  
917 *Sciences of the United States of America* **114**, E2450–E2459 (2017).

- 918 47. Robertson-Albertyn, S. *et al.* A genome-annotated bacterial collection of the  
919 barley rhizosphere microbiota. *Microbiology Resource Announcements* **11**, 2  
920 (2022) .
- 921 48. Bergelson, J., Mittelstrass, J. & Horton, M. W. Characterizing both bacteria and  
922 fungi improves understanding of the Arabidopsis root microbiome. *Scientific*  
923 *reports* **9**, (2019).
- 924 49. Mwafurirwa, L. *et al.* Identification of barley genetic regions influencing plant-  
925 microbe interactions and carbon cycling in soil. *Plant Soil* **468**, 165–182  
926 (2021). .
- 927 50. van Wersch, S., Tian, L., Hoy, R. & Li, X. Plant NLRs: The whistleblowers of  
928 plant immunity. *Plant Communications* **1**, 100016 (2020).
- 929 51. Jones, J. D. G. & Dangl, J. L. The plant immune system. *Nature* **2006**  
930 *444:7117* **444**, 323–329 (2006).
- 931 52. Bailey, P. C. *et al.* Dominant integration locus drives continuous diversification  
932 of plant immune receptors with exogenous domain fusions. *Genome Biology*  
933 **19**, 1–18 (2018).
- 934 53. Wang, H., Zou, S., Li, Y., Lin, F. & Tang, D. An ankyrin-repeat and WRKY-  
935 domain-containing immune receptor confers stripe rust resistance in wheat.  
936 *Nature Communications* **2020 11:1** **11**, 1–11 (2020).
- 937 54. Cesari, S., Bernoux, M., Moncuquet, P., Kroj, T. & Dodds, P. N. A novel  
938 conserved mechanism for plant NLR protein pairs: The “integrated decoy”  
939 hypothesis. *Frontiers in Plant Science* **5**, 25 (2014).
- 940 55. Wu, C. H., Krasileva, K. V., Banfield, M. J., Terauchi, R. & Kamoun, S.  
941 The “sensor domains” of plant NLR proteins: More than decoys? *Frontiers in*  
942 *Plant Science* **6**, 134 (2015).
- 943 56. Wu, Y. *et al.* The Arabidopsis NPR1 protein is a receptor for the plant defense  
944 hormone salicylic acid. *Cell reports* **1**, 639–647 (2012).
- 945 57. Chen, H. *et al.* A Bacterial Type III Effector Targets the Master Regulator of  
946 Salicylic Acid Signaling, NPR1, to Subvert Plant Immunity. *Cell Host and*  
947 *Microbe* **22**, 777-788.e7 (2017).
- 948 58. Zavaliev, R., Mohan, R., Chen, T. & Dong, X. Formation of NPR1  
949 Condensates Promotes Cell Survival during the Plant Immune Response. *Cell*  
950 **182**, 1093-1108.e18 (2020).
- 951 59. Lebeis, S. L. *et al.* Salicylic acid modulates colonization of the root microbiome  
952 by specific bacterial taxa. *Science* **349**, 860–864 (2015).
- 953 60. Mayer, K. F. X. *et al.* A physical, genetic and functional sequence assembly of  
954 the barley genome. *Nature* **2012 491:7426** **491**, 711–716 (2012).
- 955 61. Mascher, M. *et al.* A chromosome conformation capture ordered sequence of  
956 the barley genome. *Nature* **2017 544:7651** **544**, 427–433 (2017).

- 957 62. Eklöf, J. M. & Brumer, H. The XTH gene family: an update on enzyme  
958 structure, function, and phylogeny in xyloglucan remodeling. *Plant Physiology*  
959 **153**, 456–466 (2010).
- 960 63. Fu, M.-M. *et al.* Genome-wide identification, characterization and expression  
961 analysis of xyloglucan endotransglucosylase/hydrolase genes family in barley  
962 (*Hordeum vulgare*). *Molecules* 2019, Vol. 24, Page 1935 **24**, 1935 (2019).
- 963 64. Ezquer, I., Salameh, I., Colombo, L. & Kalaitzis, P. Plant cell walls tackling  
964 climate change: biotechnological strategies to improve crop adaptations and  
965 photosynthesis in response to global warming. *Plants* 2020, Vol. 9, Page 212  
966 **9**, 212 (2020).
- 967 65. Bulgarelli, D. *et al.* Revealing structure and assembly cues for Arabidopsis  
968 root-inhabiting bacterial microbiota. *Nature* **488**, 91–95 (2012).
- 969 66. Korenblum, E. *et al.* Rhizosphere microbiome mediates systemic root  
970 metabolite exudation by root-to-root signaling. *Proceedings of the National*  
971 *Academy of Sciences of the United States of America* **117**, 3874–3883 (2020).
- 972 67. Vorwerk, S., Somerville, S. & Somerville, C. The role of plant cell wall  
973 polysaccharide composition in disease resistance. *Trends in Plant Science* **9**,  
974 203–209 (2004).
- 975 68. Zheng, S. J. *et al.* XTH31, encoding an in vitro XEH/XET-active enzyme,  
976 regulates aluminum sensitivity by modulating in vivo XET action, cell wall  
977 xyloglucan content, and aluminum binding capacity in Arabidopsis. *The Plant*  
978 *Cell* **24**, 4731–4747 (2012).
- 979 69. Takahashi, D. *et al.* Cell wall modification by the xyloglucan  
980 endotransglucosylase/hydrolase XTH19 influences freezing tolerance after  
981 cold and sub-zero acclimation. *Plant, Cell & Environment* **44**, 915–930 (2021).
- 982 70. Han, Y. *et al.* Overexpression of persimmon DkXTH1 enhanced tolerance to  
983 abiotic stress and delayed fruit softening in transgenic plants. *Plant cell reports*  
984 **36**, 583–596 (2017).
- 985 71. Nice, L. M. *et al.* Mapping agronomic traits in a wild barley advanced  
986 backcross–nested association mapping population. *Crop Science* **57**, 1199–  
987 1210 (2017).
- 988 72. Xu, X. *et al.* Genome-wide association analysis of grain yield-associated traits  
989 in a pan-european barley cultivar collection. *The Plant Genome* **11**, 170073  
990 (2018).
- 991 73. Mahdi, L. K. *et al.* The fungal root endophyte *Serendipita vermifera* displays  
992 inter-kingdom synergistic beneficial effects with the microbiota in Arabidopsis  
993 thaliana and barley. *The ISME Journal* 2021 1–14 (2021) doi:10.1038/s41396-  
994 021-01138-y.

- 995 74. Wagner, M. R., Busby, P. E. & Balint-Kurti, P. Analysis of leaf microbiome  
996 composition of near-isogenic maize lines differing in broad-spectrum disease  
997 resistance. *New Phytologist* **225**, 2152–2165 (2020).
- 998 75. Munch, D. *et al.* The *Brassicaceae* family displays divergent, shoot-skewed  
999 NLR resistance gene expression. *Plant physiology* **176**, 1598–1609 (2018).
- 1000 76. Watson, A. *et al.* Speed breeding is a powerful tool to accelerate crop research  
1001 and breeding. *Nature plants* **4**, 23–29 (2018).
- 1002 77. Garcia-Gimenez, G. *et al.* Targeted mutation of barley (1,3;1,4)- $\beta$ -glucan  
1003 synthases reveals complex relationships between the storage and cell wall  
1004 polysaccharide content. *The Plant journal*: for cell and molecular biology **104**,  
1005 1009–1022 (2020).
- 1006 78. Pourkheirandish, M. *et al.* Evolution of the grain dispersal system in barley.  
1007 undefined 162, 527–539 (2015).
- 1008 79. Escudero-Martinez, C., Foito, A., Kapadia, R., Aprile A. & Bulgarelli, D. Barley  
1009 root exudates collection and primary metabolite profiling. DOI  
1010 10.21203/rs.3.pex-1900/v1 (2022).
- 1011 80. Terrazas, R. A. *et al.* Nitrogen availability modulates the host control of the  
1012 barley rhizosphere microbiota. *bioRxiv* 605204 (2020) doi:10.1101/605204.
- 1013 81. Standard operating procedure for soil total nitrogen - Dumas dry combustion  
1014 method. <https://www.fao.org/publications/card/en/c/CB3646EN/>.
- 1015 82. Foito, A., Byrne, S. L., Shepherd, T., Stewart, D. & Barth, S. Transcriptional  
1016 and metabolic profiles of *Lolium perenne* L. genotypes in response to a PEG-  
1017 induced water stress. *Plant Biotechnol Journal* **8**, 719–32 (2009).
- 1018 83. Caporaso, J. G. *et al.* Ultra-high-throughput microbial community analysis on  
1019 the Illumina HiSeq and MiSeq platforms. *The ISME Journal* 2012 6:8 **6**, 1621–  
1020 1624 (2012).
- 1021 84. White, T.J., Bruns, T.D., Lee, S.B. and Taylor, J.W. Amplification and direct  
1022 sequencing of fungal ribosomal RNA genes for phylogenetics. In Innis, M.A.,  
1023 Gelfand, D.H., Sninsky, J.J. and White, T.J., Eds., *PCR Protocols A Guide to*  
1024 *Methods and Applications*, Academic Press, New York, 315–322 (1990). - .
- 1025 85. Thompson, L. R. *et al.* A communal catalogue reveals Earth’s multiscale  
1026 microbial diversity. *Nature* 2017 551:7681 **551**, 457–463 (2017).
- 1027 86. Callahan, B. J. *et al.* DADA2: High-resolution sample inference from Illumina  
1028 amplicon data. *Nature methods* **13**, 581–583 (2016).
- 1029 87. R Core Team. R a language and environment for statistical computing. R  
1030 Foundation for Statistical Computing, Vienna (Austria) (2018).
- 1031 88. Pietrangelo, L., Bucci, A., Maiuro, L., Bulgarelli, D. & Naclerio, G. Unraveling  
1032 the composition of the root-associated bacterial microbiota of *Phragmites*  
1033 *australis* and *Typha latifolia*. *Frontiers in Microbiology* **9**, 1650 (2018).

- 1034 89. Quast C., Pruesse E., *et al.* The SILVA ribosomal RNA gene database project:  
1035 improved data processing and web-based tools. *Nucl. Acids Res.* 41 (D1):  
1036 D590-D596 (2013).
- 1037 90. Nilsson R.H., Larsson K.H., *et al.* The UNITE database for molecular  
1038 identification of fungi: handling dark taxa and parallel taxonomic classifications.  
1039 *Nucleic Acids Research*, DOI: 10.1093/nar/gky1022 (2018).
- 1040 91. Love, M. I., Huber, W. & Anders, S. Moderated estimation of fold change and  
1041 dispersion for RNA-seq data with DESeq2. *Genome biology* **15**, (2014).
- 1042 92. Broman, K. W., Wu, H., Saunak Sen S. & Churchill, G. A. R/qtl: QTL mapping  
1043 in experimental crosses. *Bioinformatics applications note* **19**, 889–890 (2003).
- 1044 93. Sen, S. & Churchill, G. A. A statistical framework for quantitative trait mapping.  
1045 *Genetics* **159**, 371 (2001).
- 1046 94. Köster, J. & Rahmann, S. Snakemake a scalable bioinformatics workflow  
1047 engine. *Bioinformatics* **28**, 2520–2522 (2012).
- 1048 95. Patro, R., Duggal, G., Love, M. I., Irizarry, R. A. & Kingsford, C. Salmon  
1049 provides fast and bias-aware quantification of transcript expression. *Nature*  
1050 *Methods* 2017 14:4 **14**, 417–419 (2017).
- 1051 96. Guo, W. *et al.* 3D RNA-seq: a powerful and flexible tool for rapid and accurate  
1052 differential expression and alternative splicing analysis of RNA-seq data for  
1053 biologists. *RNA biology* **18**, 1574–1587 (2021).
- 1054 97. Sonesson, C., Matthes, K. L., Nowicka, M., Law, C. W. & Robinson, M. D.  
1055 Isoform prefiltering improves performance of count-based methods for analysis  
1056 of differential transcript usage. *Genome Biology* **17**, 1–15 (2016).
- 1057 98. Bullard, J. H., Purdom, E., Hansen, K. D. & Dudoit, S. Evaluation of statistical  
1058 methods for normalization and differential expression in mRNA-Seq  
1059 experiments. *BMC Bioinformatics* **11**, 1–13 (2010).
- 1060 99. McInnes, L., Healy, J., Saul, N. & Großberger, L. UMAP: Uniform Manifold  
1061 Approximation and Projection Software • Review • Repository • Archive. (2018)  
1062 doi:10.21105/joss.00861.
- 1063 100. McCarthy, D. J., Chen, Y. & Smyth, G. K. Differential expression analysis of  
1064 multifactor RNA-Seq experiments with respect to biological variation. *Nucleic*  
1065 *acids research* **40**, 4288–4297 (2012).
- 1066 101. Benjamini, Y. & Yekutieli, D. The control of the false discovery rate in multiple  
1067 testing under dependency. *Ann. Statist.* **29**, 1165–1188 (2001).
- 1068 102. Dobin, A. *et al.* STAR: ultrafast universal RNA-seq aligner. *Bioinformatics* **29**,  
1069 15–21 (2013).
- 1070 103. Oikkonen, L. & Lise, S. Making the most of RNA-seq: Pre-processing  
1071 sequencing data with Opossum for reliable SNP variant detection. *Wellcome*  
1072 *Open Research* **2**, (2017).



- 1073 104. Rimmer, A., Phan, H., Mathieson, I. et al. Integrating mapping-, assembly- and  
1074 haplotype-based approaches for calling variants in clinical sequencing  
1075 applications. *Nat Genet* **46**, 912–918 (2014)..
- 1076 105. Altschul, S. F., Gish, W., Miller, W., Myers, E. W. & Lipman, D. J. Basic local  
1077 alignment search tool. *Journal of molecular biology* **215**, 403–410 (1990).
- 1078 106. Marçais, G. *et al.* MUMmer4: A fast and versatile genome alignment system.  
1079 *PLOS Computational Biology* **14**, e1005944 (2018).
- 1080 107. BulgarelliD-Lab/Microbiota\_mapping: v1.22. Identifying plant genes shaping  
1081 microbiota composition in the barley rhizosphere.  
1082 DOI:10.5281/zenodo6584148 (2022).

1083

## 1084 Acknowledgements

1085

1086 We thank Malcolm Macaulay and Jim Wilde (The James Hutton Institute,  
1087 Invergowrie, UK) for the technical assistance during the execution of the  
1088 experiments. We also thank Nils Stein and Mary Ziems (IPK, Gatersleben, Germany)  
1089 who kindly provided us with seeds of the barley pangenome collection. In addition,  
1090 we thank Malcolm Macaulay and Luke Ramsay (The James Hutton Institute,  
1091 Invergowrie, UK) who provided access to the diagnostic technology for Btr genes.  
1092 This work was supported by a Royal Society of Edinburgh Personal Research  
1093 Fellowship to DB and an UKRI grant (BB/S002871/1) to DB, GB and RW.

## 1094 Author Contributions

1095

1096 C.E.M., R.A.T., R.W. and D.B designed the experiments. C.E.M., M.C., R.S., J.A.,  
1097 G.B. and D.B. conceived the data analyses. C.E.M., R.A.T., R.K., L.P., M.M, A. A.,  
1098 performed the experiments. C.E.M., M.C., A.F., R. K., A. A., R.S., G.N, T.M. and J.A.  
1099 analysed the data. J.M. and P.H. generated the amplicon sequencing libraries. A.M  
1100 and K. P. provided access to the HEB-25 seed material and analysed their genomic  
1101 information. C.E.M, M.C and D.B wrote the first version of the manuscript, all authors  
1102 collegially commented on and contributed to the submitted version. C.E.M and M.C  
1103 contributed equally to this work.

## 1104 Figure Legends

1105

1106 **Fig. 1: Barley microbiota composition displays a quantitative variation in a**  
1107 **segregating population between wild and elite parental lines. a)** Ternary plot  
1108 depicting microbiota composition in the elite and wild genotypes as well as bulk soil  
1109 samples. Each dot illustrates an individual ASV; the size of the dots is proportional to  
1110 ASV's abundance while their position reflects the microhabitat where bacteria were  
1111 predominantly identified. Individual dots are colour-coded according to their  
1112 significant enrichment in the rhizosphere of either parental line (Wald Test, Individual  
1113  $P$ -values  $< 0.05$ , FDR corrected). **b)** Canonical Analysis of Principal Coordinates  
1114 computed on Bray-Curtis dissimilarity matrix. Individual dots in the plot denote  
1115 individual biological replicates whose colours depict sample type in the bottom part  
1116 of the figure. The number in the plot depicts the proportion of variance ( $R^2$ ) explained  
1117 by the factor 'Sample' within the rhizosphere microhabitat, *i.e.*, Elite, Wild or  
1118 Segregant. The asterisks associated to the  $R^2$  value denote its significance,  $P$ -value  
1119 'Sample' = 0.001; Adonis test,  $F = 2.23$ , 5,000 permutations. Source data are  
1120 provided as a Source Data file.

1121 **Fig. 2: Genetic map of the barley determinants of individual bacterial members**  
1122 **of the rhizosphere microbiota.** Circos plot depicting **a)** the seven barley  
1123 chromosomes **b)** grey connector lines link the physical position of SNPs with the  
1124 genetic position in cM as indicated in the outer part of the ring; numbers in black  
1125 within the individual chromosome define genetic positions (cM) significantly  
1126 associated (using the function *scanone* implementing interval mapping with a single-  
1127 QTL model, expectation-maximization algorithm, LOD genome-wide significance  
1128 threshold 20 % adjusted per taxa, 1,000 permutations) to the differential enrichment  
1129 of individual **c)** ASVs, **d)** genus or **e)** family, respectively. Different shapes depict  
1130 taxonomic assignment at phylum level. Shapes are colour-coded according to the  
1131 microbiota of the parental line where individual taxa were identified. Source data are  
1132 provided as a Source Data file.

1133 **Fig. 3: Wild alleles at locus *QRMC-3HS* are associated with a shift in the**  
1134 **composition of the bacterial, but not fungal, microbiota.** Canonical Analysis of  
1135 Principal Coordinates computed on Bray-Curtis dissimilarity matrix of **a)** bacterial or  
1136 **b)** fungal ASVs' abundances. Sample type is depicted in the bottom part of the  
1137 figure. The number in the plots show the proportion of variance ( $R^2$ ) explained by the  
1138 factors 'Batch' and 'Genotype', respectively. Asterisks associated to the  $R^2$  value

1139 denote its significance, ns not significant. **a)**  $P$ -value 'Batch' = 0.278,  $F$  = 1.10;  $P$ -  
1140 value 'Genotype' = 0.005,  $F$  = 1.84; Adonis test 5,000 permutations. **b)**  $P$ -value  
1141 'Batch' = 0.027,  $F$ =3.05;  $P$ -value 'Genotype' = 0.963,  $F$  = 0.26; Adonis test 5,000  
1142 permutations. Source data are provided as a Source Data file.

1143 **Fig. 4: The sibling lines harbouring contrasting alleles at locus *QRMC-3HS* and**  
1144 **the cultivar Barke display distinct root transcriptional profiles.** Venn diagram  
1145 showing the number of differentially expressed genes among pairs of comparisons  
1146 between the sibling lines 124\_52 (wild-like), 124\_17 (elite-like) and their elite parent  
1147 Barke (EdgeR pair-wise comparison, individual  $P$ -values <0.01, FDR corrected).  
1148 Source data are provided as a Source Data file.

1149 **Fig. 5: Differentially expressed genes mapping at locus *QRMC-3HS*.** **a)** Dots  
1150 depict individual genes and their expression pattern in the pair-wise comparison  
1151 124\_17 vs. 124\_52 ( $\log_2$  Fold-Change), colour-coded according to their significance  
1152 as illustrated at the bottom of the figure (EdgeR, individual  $P$ -values <0.01, FDR  
1153 corrected). **b)** Projection of the individual genes on the structures of chromosome 3H  
1154 for the lines 124\_17 (elite-like) and 124\_52 (wild-like), respectively, colour-coded  
1155 according to allelic composition as indicated in the key at the bottom of the figure.  
1156 The physical location of locus *QRMC-3HS* is highlighted in pale pink. Source data  
1157 are provided as a Source Data file.

1158 **Fig. 6: Locus *QRMC-3HS* defines an area of structural variation in the barley**  
1159 **genome.** Alignment visualisation of the sequence at and surrounding the *QRMC-*  
1160 *3HS* locus comparing **a)** the cultivars Barke and Morex and **b)** Barke to cultivar  
1161 Golden Promise. The *QRMC-3HS* locus is shown in white, while purple dots  
1162 represent sequencing matches longer than 1,000 bp and  $\geq 95$  % identity. The gap in  
1163 the diagonal in **a)** denotes a disruption of synteny between the two genotypes.  
1164 Numbers on the axis denote the physical interval, in bp, analysed in the given  
1165 genomes. Source data are provided as a Source Data file.

1166 **Fig. 7: The *NLR* gene associated with genotype-dependent transcriptional and**  
1167 **genomic variations.** **a)** Boxplot showing the root RNA-seq *NLR* expression across  
1168 the elite and the sibling lines in normalized counts per million. Individual dots depict  
1169 individual biological replicates. Upper and lower edges of the box plots represent the  
1170 upper and lower quartiles, respectively. The bold line within the box denotes the

1171 median. Whiskers denote values within 1.5 interquartile ranges. **b)** Schematic  
1172 representation of the *NLR* gene transcripts inferred from the RNA-seq data depicting  
1173 predicted protein domains from InterProScan. The black arrow depicts the predicted  
1174 amplicon site of the PCR marker **c)** PCR amplicons partially covering the intron  
1175 between the LRR and the ankyrin domains in the indicated genotypes-Negative  
1176 control (NC). A DNA ladder was loaded in the first and last well of each lane,  
1177 arrowheads indicate the 200 bp fragment. The diagnostic screening was repeated  
1178 twice with identical results. Source data are provided as a Source Data file.

**Fig.1: Microbiota composition displays a quantitative variation in a barley segregant population between wild and elite parental lines**

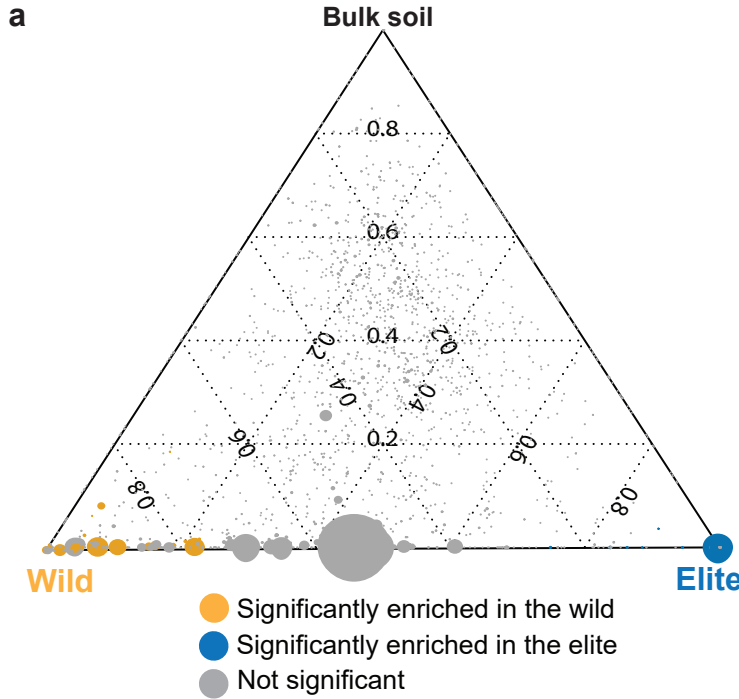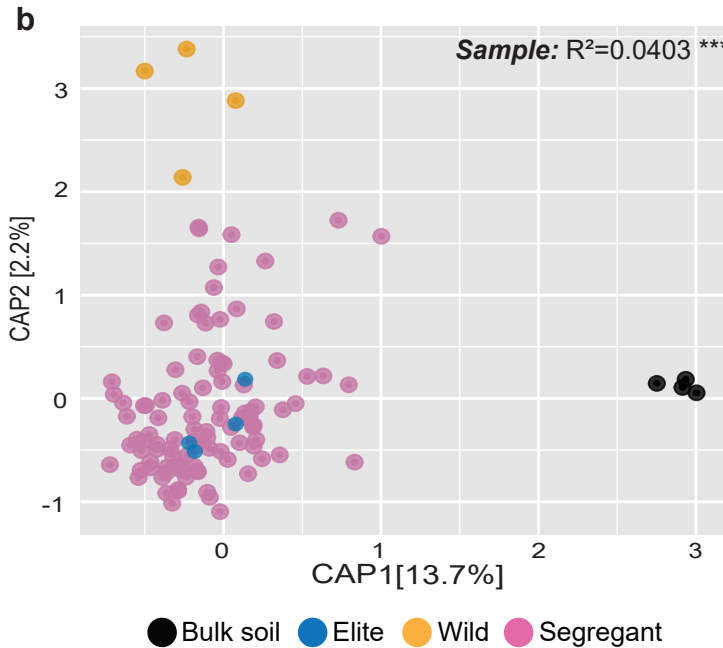

**Fig.2: Genetic map of the barley determinants of individual bacterial members of the rhizosphere microbiota**

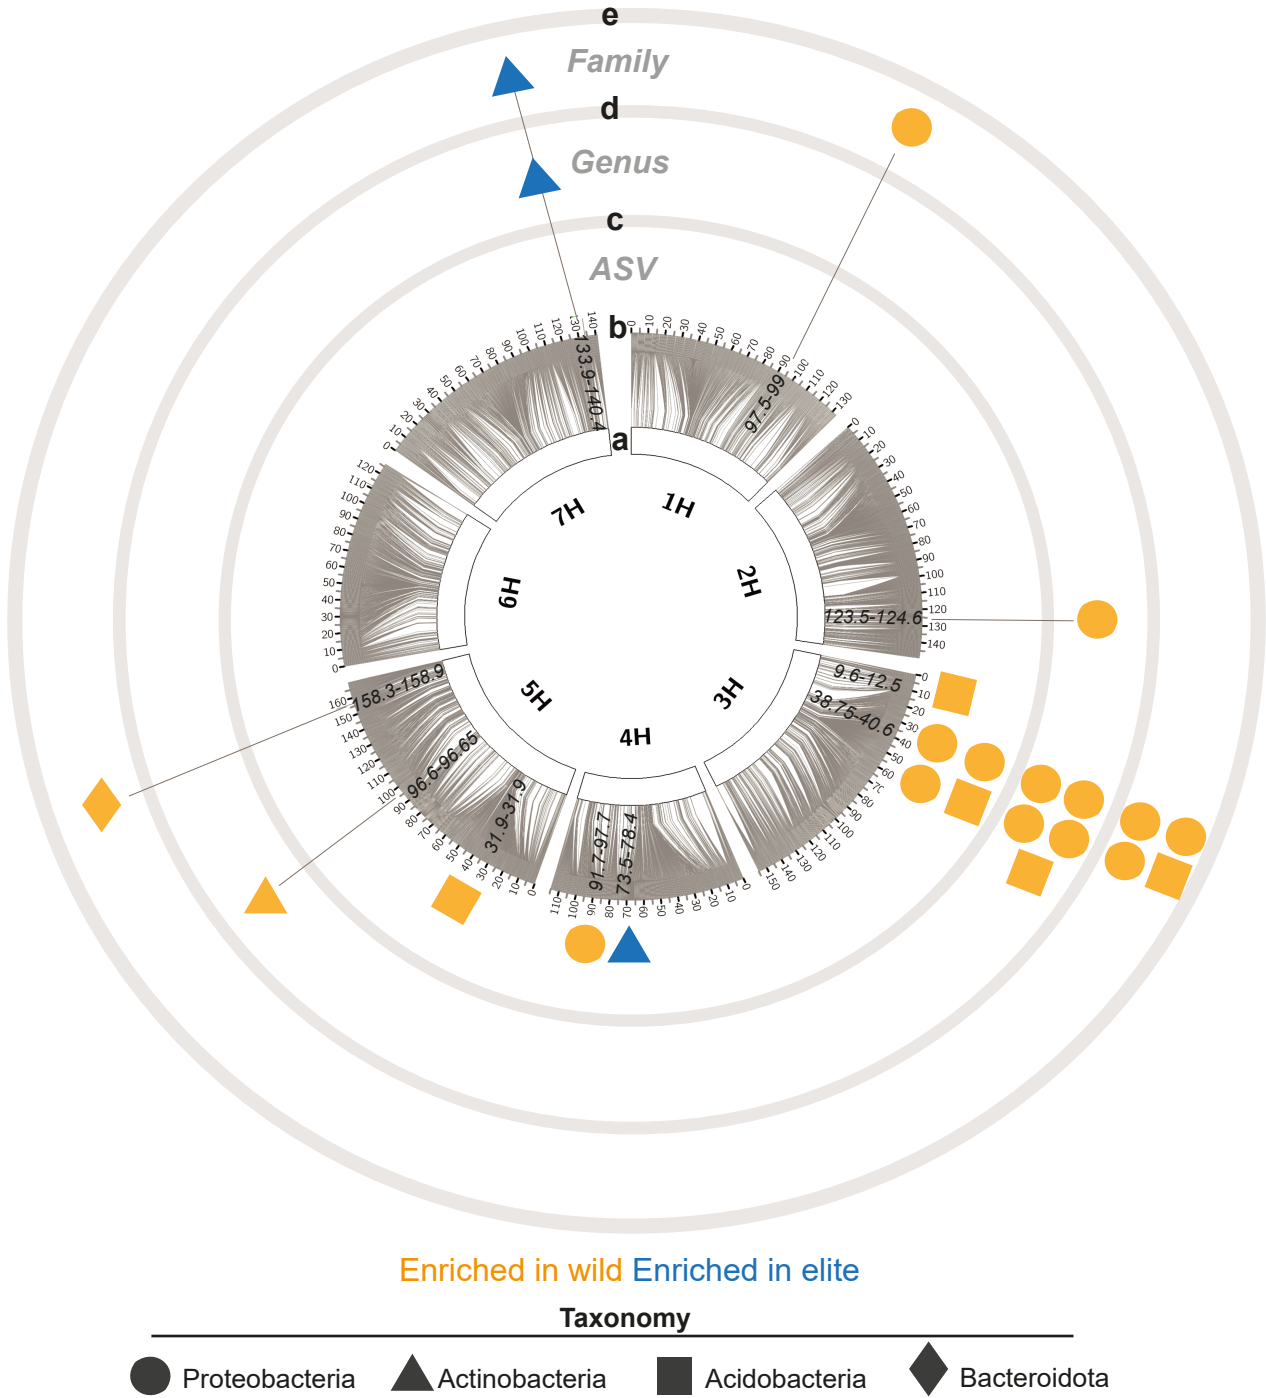

**Fig. 3 : Wild alleles at locus *QRMC-3HS* are associated to a shift in the composition of the bacterial, but not fungal, microbiota**

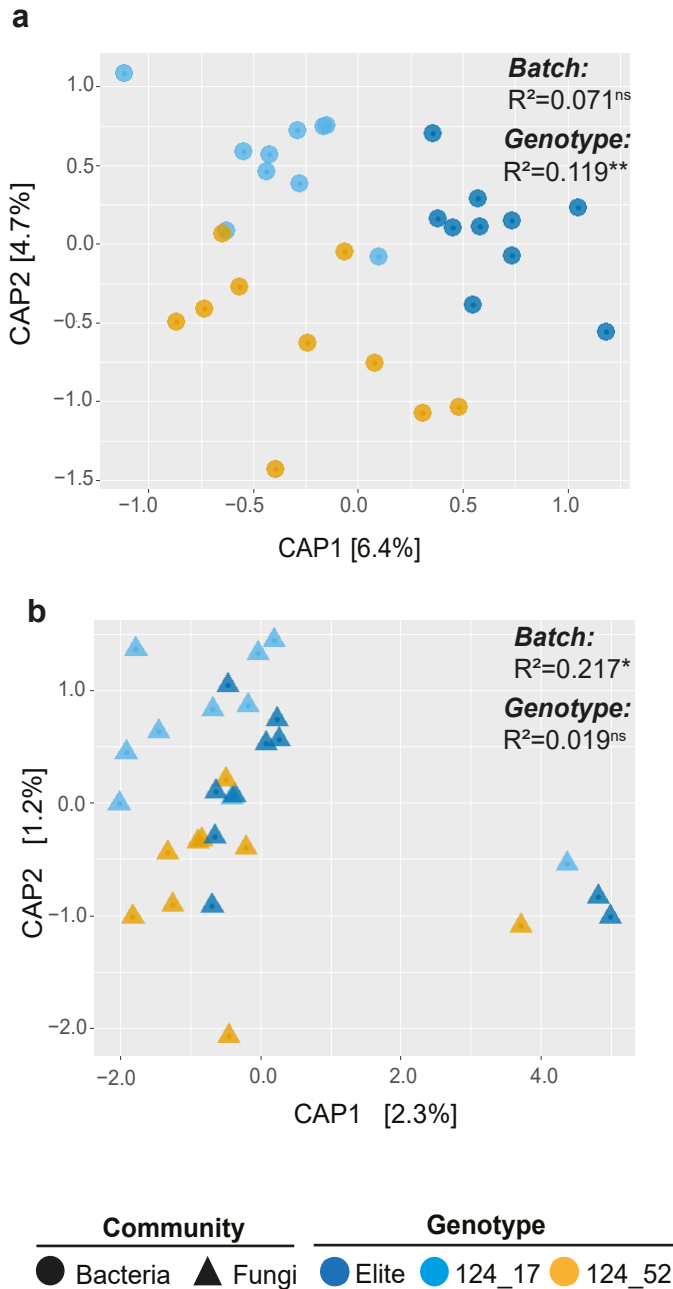

**Fig. 4: Sibling lines harboring contrasting alleles at locus *QRMC-3HS* and the cultivar Barke display distinct root transcriptional profiles**

**124\_52 - Barke**

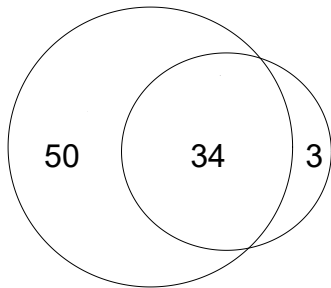

**124\_52 - 124\_17**



**Fig. 5: Differentially expressed genes mapping at locus *QRMC-3HS***

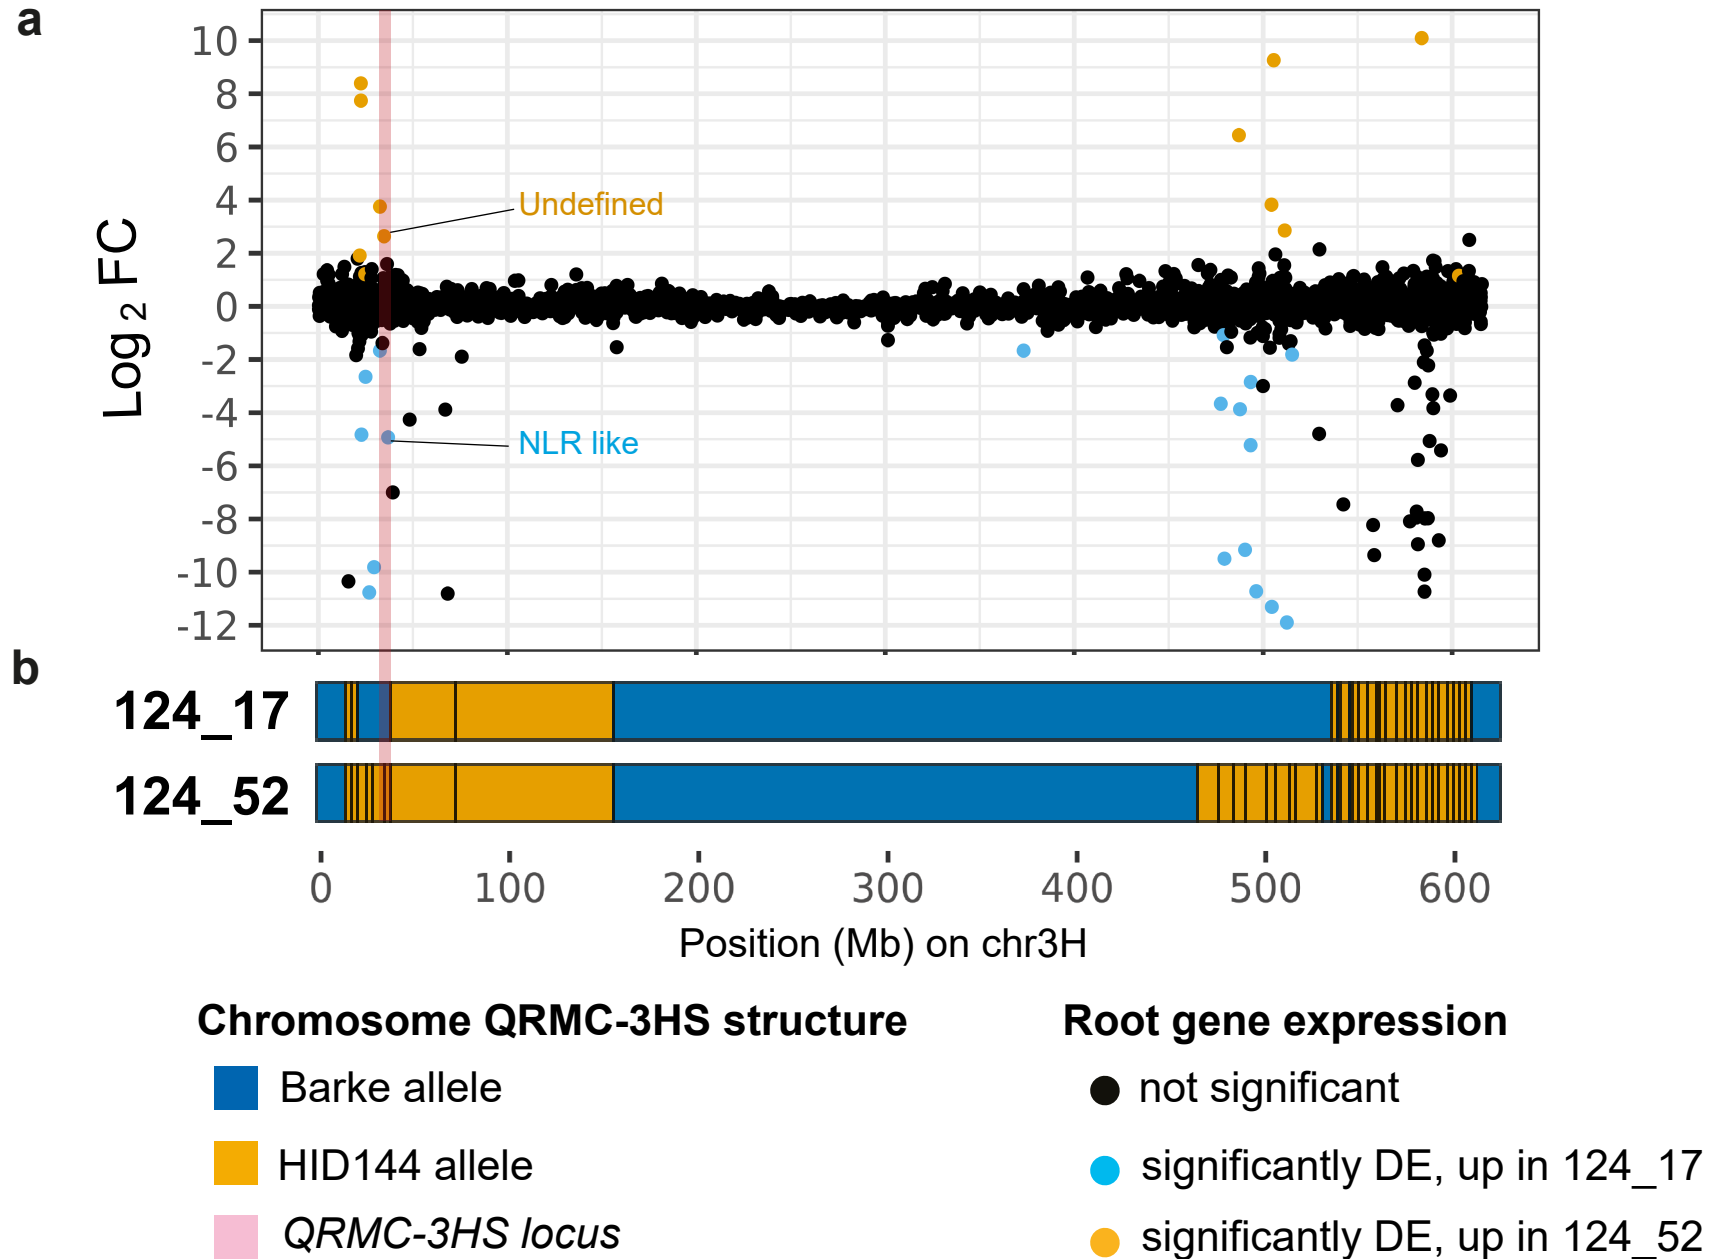

**Fig. 6 : Locus *QRMC-3HS* defines an area of structural variation in the barley genome**

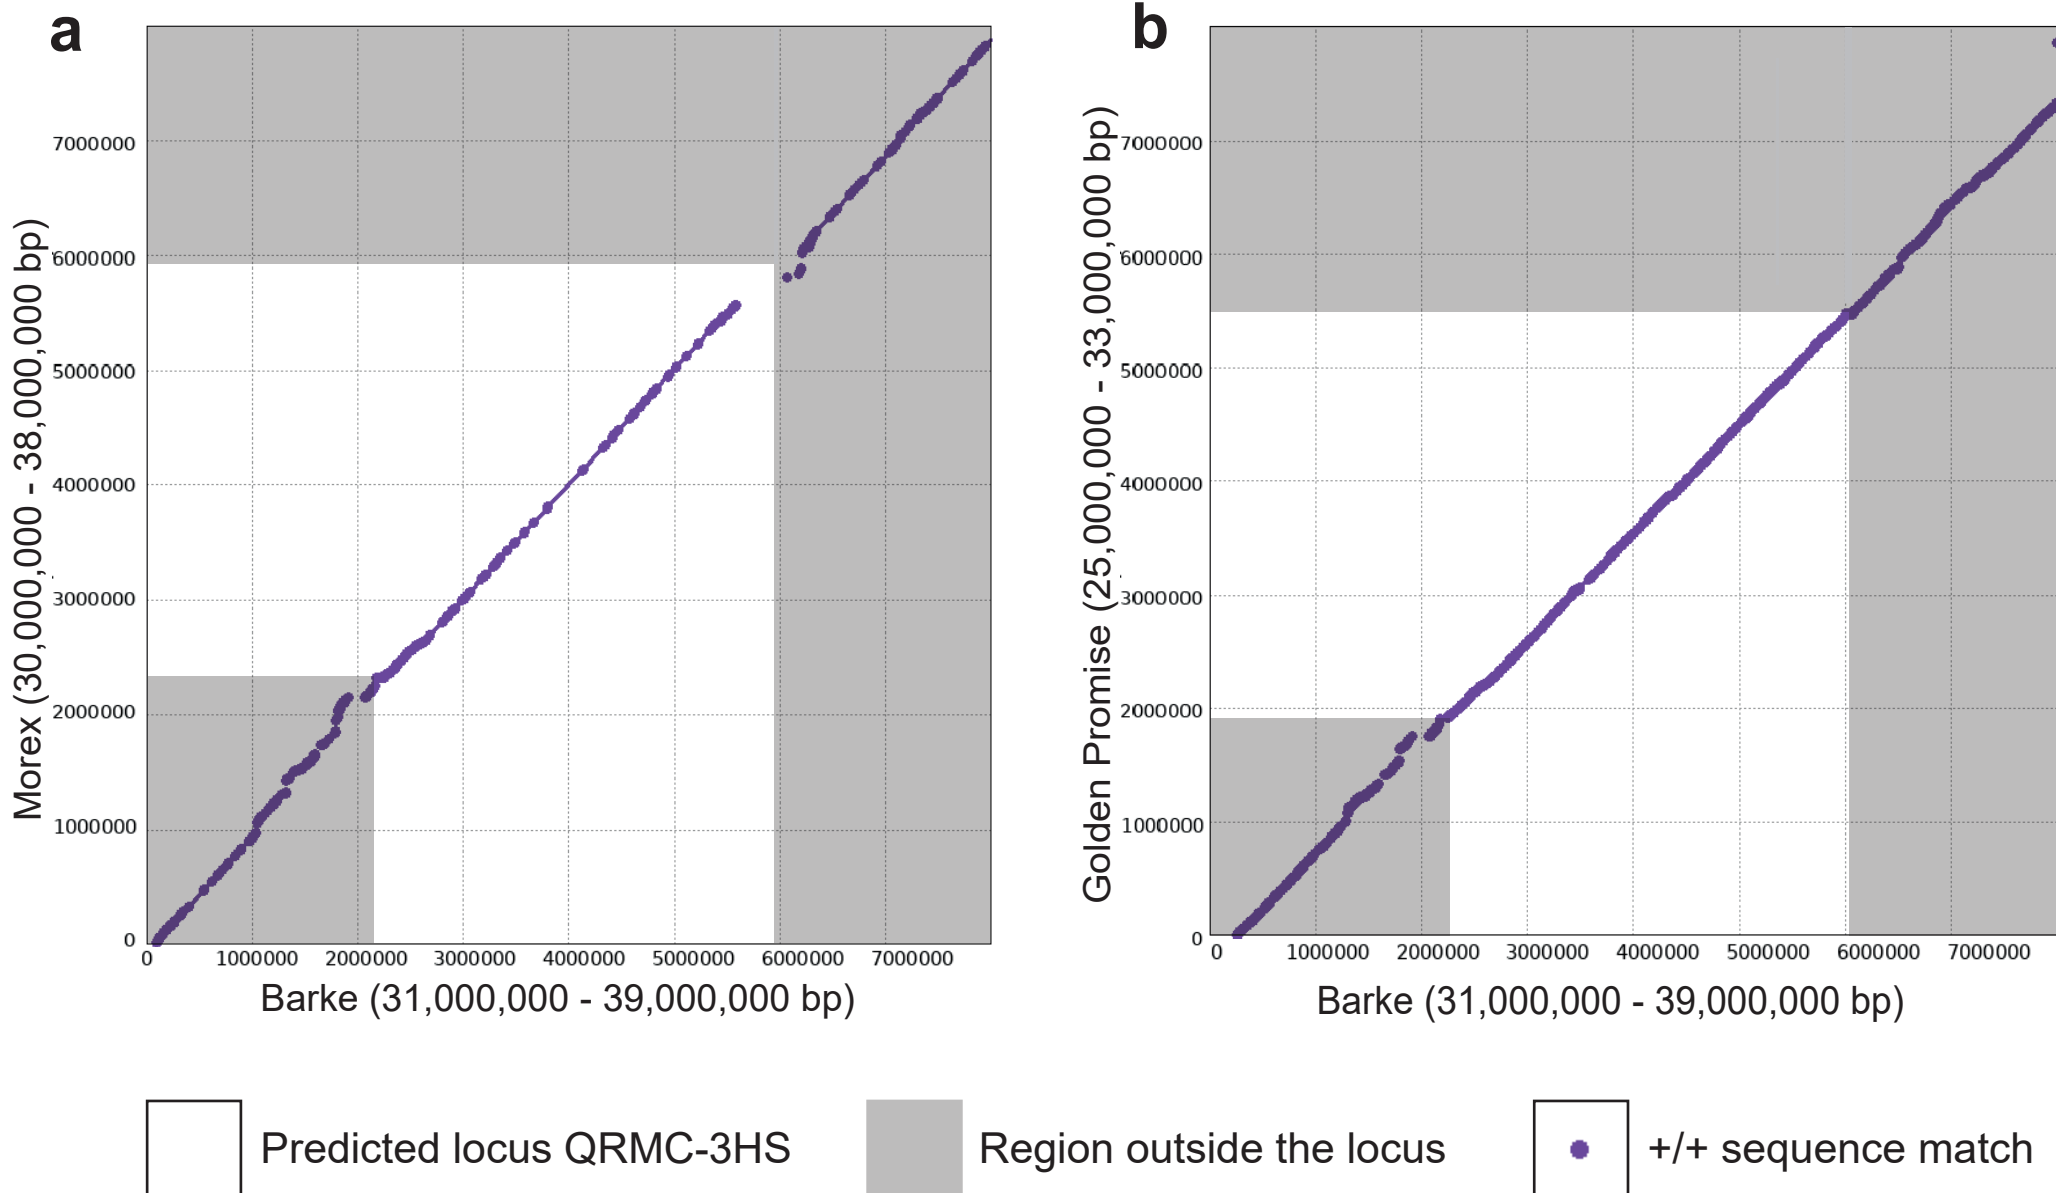

**Fig. 7: The *NLR* gene is associated with genotype-dependent transcriptional and genomic variations**

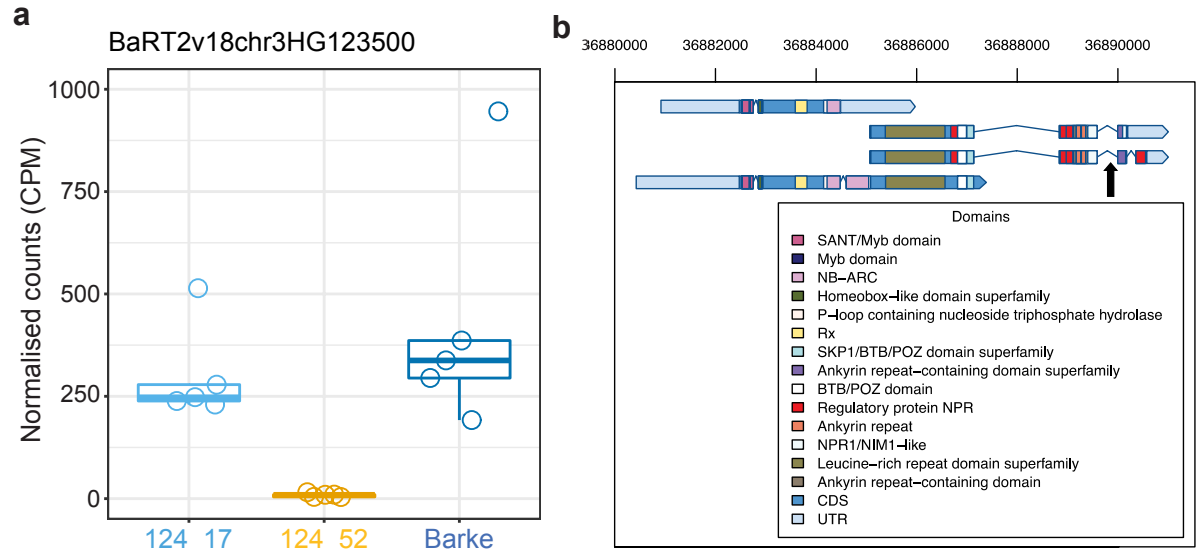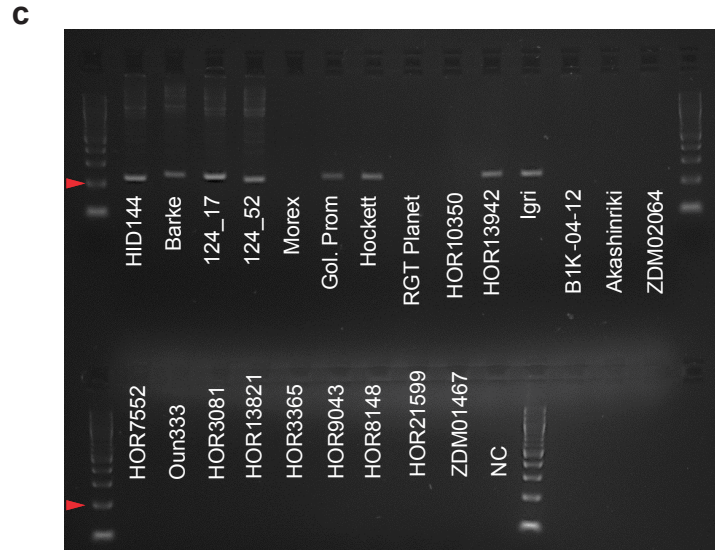

Source: https://www.biorxiv.org/content/10.1101/2021.12.20.472907v3.full.pdf
